# Supplementary material for: Bacillus thuringiensis toxins divert progenitor cells toward enteroendocrine fate by decreasing cell adhesion with intestinal stem cells in Drosophila
Source: eLife journal article supplement (doi:10.7554/elife.80179), 2023-02-06
Supplement: fig1-figsupp2-data1 [file 2A.xlsx]

## Sheet: Global
Day 1	ISC	EB	EEP	EE	EC	nbr of cells		Day 3	ISC	EB	EEP	EE	EC	nnb of cells		Day 5	ISC	EB	EEP	EE	EC	nnb of cells
H2O	10.63	15.35	2.13	13.18	100.1	141.39		H2O	11.06	18.56	2.17	13.31	97.8	142.9		H2O	10.72	20.33	1.94	13.09	92.9	138.98
4D22	11.5	20.68	2.22	12.78	108.4	155.58		4D22	10.27	24.04	2.24	13.13	116.1	165.78		4D22	12.34	23.65	1.86	14.05	92.3	144.2
SA11	15.09	20.78	5.89	15.56	92.1	149.42		SA11	17.04	22.63	5.66	20.64	84.5	150.47		SA11	16.05	23.56	4.14	15.45	94.7	153.9
Crystals	13.92	20.21	4.3	16.57	93.5	148.5		Crystals	15.55	24.4	3.53	19.53	80	143.01		Crystals	14.63	22.77	5.66	17.09	84.2	144.35
Day 1	ISC	EB	EEP	EE	EC	% total		Day 3	ISC	EB	EEP	EE	EC	% total		Day 5	ISC	EB	EEP	EE	EC	% total
H2O	7.51821	10.8565	1.50647	9.32173	70.7971	100		H2O	7.73968	12.9881	1.51854	9.31421	68.4395	100		H2O	7.71334	14.628	1.39588	9.41862	66.8442	100
4D22	7.3917	13.2922	1.42692	8.21442	69.6748	100		4D22	6.19496	14.5011	1.35119	7.92014	70.0326	100		4D22	8.55756	16.4008	1.28988	9.74341	64.0083	100
SA11	10.099	13.9071	3.94191	10.4136	61.6383	100		SA11	11.3245	15.0395	3.76155	13.717	56.1574	100		SA11	10.4288	15.3086	2.69006	10.039	61.5335	100
Crystals	9.37374	13.6094	2.89562	11.1582	62.963	100		Crystals	10.8734	17.0617	2.46836	13.6564	55.9401	100		Crystals	10.1351	15.7742	3.92103	11.8393	58.3304	100
Day 1	H2O	BtkDCry	SA11	Crystals				Day 3	H2O	BtkDCry	SA11	Crystals				Day 5	H2O	BtkDCry	SA11	Crystals
ISC	7.51821	7.3917	10.099	9.37374				ISC	7.73968	6.19496	11.3245	10.8734				ISC	7.71334	8.55756	10.4288	10.1351
EB	10.8565	13.2922	13.9071	13.6094				EB	12.9881	14.5011	15.0395	17.0617				EB	14.628	16.4008	15.3086	15.7742
EC	70.7971	69.6748	61.6383	62.963				EC	68.4395	70.0326	56.1574	55.9401				EC	66.8442	64.0083	61.5335	58.3304
EEP	1.50647	1.42692	3.94191	2.89562				EEP	1.51854	1.35119	3.76155	2.46836				EEP	1.39588	1.28988	2.69006	3.92103
EE	9.32173	8.21442	10.4136	11.1582				EE	9.31421	7.92014	13.717	13.6564				EE	9.41862	9.74341	10.039	11.8393
% total	100	100	100	100				% total	100	100	100	100				% total	100	100	100	100
Day 1	H2O	BtkDCry	SA11	Crystals				Day 3	H2O	BtkDCry	SA11	Crystals				Day 5	H2O	BtkDCry	SA11	Crystals
ISC	7.51821	7.3917	10.099	9.37374				ISC	7.73968	6.19496	11.3245	10.8734				ISC	7.71334	8.55756	10.4288	10.1351
EB	10.8565	13.2922	13.9071	13.6094				EB	12.9881	14.5011	15.0395	17.0617				EB	14.628	16.4008	15.3086	15.7742
EC	70.7971	69.6748	61.6383	62.963				EC	68.4395	70.0326	56.1574	55.9401				EC	66.8442	64.0083	61.5335	58.3304
Pros+	10.8282	9.64134	14.3555	14.0539				Pros+	10.8328	9.27132	17.4786	16.1247				Pros+	10.8145	11.0333	12.729	15.7603
% total	100	100	100	100				0	100	100	100	100				0	100	100	100	100
