# Supplementary material for: Bacillus thuringiensis toxins divert progenitor cells toward enteroendocrine fate by decreasing cell adhesion with intestinal stem cells in Drosophila
Source: eLife journal article supplement (doi:10.7554/elife.80179), 2023-02-06
Supplement: fig3-data1 [file 3F Comptage des Pros.xlsx]

## Sheet: comptage pros eau 
intestin	surface	photos	RFP-pros+		RFP+pros+				lineage cellulaire 181219
1	31766.3	un64	7	4.40718	0	0								rfp-pros+		rfp+pros+
2	25010.1	un76	13	10.3958	0	0								6.02878		0.835998
3	27312.9	un83	7	5.12579	0	0								9.06771		0.445695
4	35737.9	un90	8	4.47704	0	0								11.7096		0.591864
5	26214.5	un97	4	3.05174	0	0								8.37656		0
6	29574.5	un104	9	6.08632	3	2.02877								8.79567		0.468389
7	29346.3	un111	11	7.49669	5	3.40758
8	31579.4	un118	7	4.43327	2	1.26665
9	32077.6	un125	11	6.85836	3	1.87046
10	27455	un132	15	10.927	0	0
11	23472.9	un139	11	9.37253	0	0
12	21839.6	un146	15	13.7365	0	0
13	25708.4	un153	5	3.88978	0	0
14	31066.3	un160	6	3.86271	2	1.28757
15	27995.9	un167	6	4.28634	5	3.57195
16	32729.1	un174	6	3.66646	1	0.611076
17	20736.2	un188	5	4.82249	0	0
18	31253	un195	4	2.55975	0	0
19	33727.8	un202	2	1.18596	1	0.592982
20	31203.9	un209	4	2.56378	0	0
21	29529.7	un223	6	4.0637	1	0.677284
22	32686.5	un230	9	5.50686	5	3.05937
23	34591.9	un237	5	2.89085	2	1.15634
24	35590.2	un244	4	2.24781	0	0
25	22756	un260	14	12.3044	0	0
26	20938.7	un267	14	13.3724	0	0
27	23674.1	un274	16	13.5169	0	0
28	30955.8	un281	15	9.69122	0	0
29	29803.8	un288	5	3.35527	4	2.68422
30	33084.8	un295	7	4.23156	6	3.62705
31	30976.1	un302	11	7.10225	4	2.58264
32	29300.8	un309	9	6.14318	0	0
33	28847.1	un316	6	4.15987	0	0
34	31378.6	un323	5	3.18689	0	0
				6.02878		0.835998
intestin	surface		rfp-pros+		rfp+pros+		lineage cellulaire 201219
1	20453.2	un144	11	10.7562	0	0
2	21612.3	un151	13	12.0302	0	0
3	23286.9	un158	11	9.44735	0	0
4	28187	un165	20	14.1909	0	0
5	31198.4	un172	7	4.4874	0	0
6	35094.8	un186	8	4.55908	0	0
7	36743.7	un193	6	3.26587	0	0
8	32016.9	un200	7	4.3727	0	0
9	28006.8	un214	6	4.28467	0	0
10	27176.1	un221	8	5.88754	0	0
11	25686.7	un228	13	10.122	0	0
12	28059.2	un235	14	9.97888	0	0
13	24061.7	un242	15	12.4679	0	0
14	21833.5	un249	13	11.9083	1	0.916024
15	23495.7	un263	13	11.0659	0	0
16	28118	un272	18	12.8032	6	4.26773
17	23618.6	un279	13	11.0083	0	0
18	26978.8	un286	11	8.15457	0	0
19	24357.1	un293	14	11.4956	4	3.28446
				9.06771		0.445695
intestin	surface		rfp-pros+		rfp+pros+				lineage cellulaire 3j eau 2 060120
1	30034.3	un416	21	13.984	2	1.33181
2	31153.5	un423	19	12.1977	1	0.641983
3	28722.4	un430	22	15.3191	1	0.696321
4	21850.7	un437	28	25.6285	0	0
5	34639.4	un451	20	11.5475	6	3.46426
6	27743.8	un458	18	12.9759	1	0.720881
7	23838.8	un465	15	12.5846	1	0.83897
8	29824	un472	20	13.412	0	0
9	30541	un479	15	9.82287	0	0
10	33015.7	un486	16	9.69236	0	0
11	31966.3	un493	6	3.75396	0	0
12	35786.3	un507	8	4.47099	0	0
13	32183.6	un514	11	6.83578	0	0
				11.7096		0.591864
intestin	surface		rfp-pros+		rfp+pros+			lineage cellulaire 3j eau 060120
1	22097.6	un342	20	18.1015	0	0
2	29173.5	un349	20	13.7111	0	0
3	28959	un367	17	11.7407	0	0
4	33047.6	un374	10	6.05187	0	0
5	35758.9	un381	6	3.35581	0	0
6	32702.3	un388	8	4.89262	0	0
7	33444.1	un395	4	2.39205	0	0
8	35467.1	un402	12	6.76683	0	0
				8.37656		0

## Sheet: comptage pros 4d22
intestin	surface	photos	rfp+pros+		rfp-pros+					lineage cellulaire 4d22 250619
2	30598.7	un701	0	0	19	12.4188									rfp-pros+		rfp+pros+
4	36449.6	un719	1	0.548703	26	14.2663									10.3657		0.40581
5	26846.2	un728	2	1.48997	19	14.1547									8.16911		0.443967
6	33323.5	un737	2	1.20035	22	13.2039									9.26739		0.424889
7	34119	un754	0	0	18	10.5513
8	32451.4	un763	0	0	17	10.4772
9	32656.2	un781	2	1.22488	15	9.18662
10	34774.2	un790	0	0	12	6.90167
11	31487.3	un799	0	0	11	6.98695
12	32327.8	un810	0	0	12	7.42395
14	30765.1	un836	0	0	13	8.45113
				0.40581		10.3657
1	33153.1	un60	1	0.603262	13	7.8424
4	34010.3	un106	2	1.17611	12	7.05668
5	32631.4	un113	0	0	11	6.74196			130721
6	33048.4	un120	0	0	15	9.07759
7	31777.6	un127	0	0	11	6.92311
9	31967.5	un144	1	0.625636	8	5.00509
10	33593.3	un151	0	0	12	7.14429
11	29326.9	un158	2	1.36393	8	5.45574
12	25666.9	un170	0	0	15	11.6882
13	29818.4	un177	1	0.670727	22	14.756
				0.443967		8.16911

## Sheet: comptage pros delfin 
intestin	surface		rfp+pros+		rfp-pros+				lineage 3j dipel 29° 181219						rfp+pros+		rfp-pros+
1	35807.7	un365	9	5.02685	13	7.261									8.47065		8.51076
2	35566.3	un372	19	10.6843	10	5.6233									8.85934		6.71801
3	31358.7	un379	27	17.2201	22	14.0312									10.5449		8.57369
4	33759.6	un386	19	11.2561	16	9.47879									9.29164		7.93415
5	35369.5	un393	15	8.48189	10	5.6546
6	30991.5	un400	11	7.09871	12	7.74405
7	35689.7	un407	6	3.36231	13	7.28501
8	34519.8	un414	8	4.63502	19	11.0082
				8.47065		8.51076
intestin	surface		rfp+pros+		rfp-pros+				lineage cellulaire3j 191219
1	32571.1	un41	6	3.68424	9	5.52636
2	35522.4	un48	5	2.81513	10	5.63025
3	35384.6	un55	18	10.1739	32	18.087
4	35317.7	un83	17	9.6269	13	7.36175
5	34757.1	un90	28	16.1118	10	5.75422
6	38466.9	un97	39	20.2772	9	4.67935
7	36972.3	un104	35	18.9331	7	3.78662
8	36136.3	un111	26	14.39	5	2.7673
9	37478.4	un118	12	6.40369	10	5.33641
10	35973.7	un125	8	4.44769	5	2.77981
11	36582.3	un132	8	4.3737	6	3.28028
12	36530.4	un146	4	2.18996	9	4.92741
13	30469.5	un179	6	3.93837	21	13.7843
14	34691.1	un186	19	10.9538	15	8.64776
15	34941.9	un193	18	10.3028	9	5.1514
16	34300.4	un228	6	3.4985	23	13.4109
17	36185.1	un235	11	6.07985	19	10.5016
18	33365.3	un242	4	2.3977	18	10.7896
19	31688.4	un249	10	6.31146	7	4.41802
20	34477.2	un256	6	3.48056	4	2.32037
21	35392.9	un263	3	1.69526	5	2.82543
22	34529.5	un314	24	13.9012	20	11.5843
23	35786.8	un328	13	7.26526	11	6.14753
24	35386.5	un342	5	2.82594	16	9.04299
25	32438.7	un407	23	14.1806	12	7.39857
26	34601.2	un414	20	11.5603	3	1.73404
27	36198.2	un421	26	14.3654	24	13.2603
28	36707.5	un442	28	15.2557	6	3.26908
29	32298.1	un454	25	15.4808	1	0.619232
				8.85934		6.71801
intestin	surface		rfp+pros+		rfp-pros+			lineage 3j dipel 201219
1	34917.8	un326	7	4.00942	16	9.16438
2	34941.1	un333	24	13.7374	12	6.8687
3	35032.7	un340	18	10.2761	10	5.70895
4	35377.6	un347	6	3.39198	18	10.1759
5	36291.7	un354	28	15.4305	12	6.61308
6	31158.2	un373	18	11.554	19	12.1958
7	33126.9	un387	15	9.05608	23	13.886
8	34511.3	un394	29	16.8061	16	9.27232
9	31017.9	un415	15	9.67184	16	10.3166
10	33409.4	un442	13	7.78225	13	7.78225
11	32469.9	un429	15	9.23934	19	11.7032
12	35715.7	un436	20	11.1996	11	6.15975
13	34222.2	un443	14	8.18183	8	4.67533
14	32808.6	un457	22	13.4111	14	8.53434
15	36045	un464	26	14.4264	10	5.54863
				10.5449		8.57369

## Sheet: comptage pros cristaux 
intestin	surface	photos	rfp+pros+		rfp-pros+						lineage cristaux 3j 15062021
1	36375.1	un144	36	19.7938	11	6.0481									rfp+pros+		rfp-pros+
2	32017.3	un158	18	11.2439	14	8.74528									18.436		4.58694
3	31827.1	un165	25	15.7099	6	3.77037									18.918		6.70514
4	34487.6	un172	43	24.9365	7	4.05943									18.677		5.64604
5	34942.4	un181	34	19.4606	5	2.86185
6	33580.2	un188	46	27.3971	4	2.38236
7	35868.3	un195	27	15.0551	7	3.90316
8	33839.7	un211	35	20.6857	13	7.68328
9	33102.9	un218	31	18.7295	4	2.4167
10	34547.9	un225	14	8.10469	5	2.89453
11	36708.1	un235	56	30.511	6	3.26904
12	33689.2	un242	26	15.4352	8	4.7493
13	32739	un249	38	23.2139	3	1.83268
14	32345.3	un256	25	15.4582	8	4.94663
15	33454.1	un269	39	23.3155	10	5.97834
16	34305.9	un276	23	13.4088	11	6.41289
17	36520.6	un290	20	10.9527	11	6.02399
				18.436		4.58694
intestin	surface	photos	rfp+pros+		rfp-pros+						lineage cristaux 130721
1	30665.9	un210	30	19.5657	20	13.0438
2	33717.1	un226	25	14.8293	9	5.33854
3	35538.4	un233	24	13.5065	6	3.37663
4	31017.4	un240	14	9.02718	5	3.22399
5	32376.9	un247	40	24.7089	11	6.79496
6	34301.1	un254	46	26.8213	19	11.0784
7	30350.3	un281	35	23.064	20	13.1794
8	34762.4	un288	43	24.7394	5	2.87667
9	32577.3	un295	35	21.4873	7	4.29747
10	33041.4	un306	25	15.1326	16	9.68483
11	36070.8	un313	25	13.8616	7	3.88125
12	32557.3	un322	33	20.272	6	3.68581
				18.918		6.70514

## Sheet: stat rfp- pros+
eau	4d22	stat rfp-pros+
4.40718	#REF!
10.3958	12.4188			Tukey-Kramer Test: Pairwise Comparisons for One-Way Layout Design
5.12579	#REF!
4.47704	14.2663				eau	4d22											#REF!
3.05174	14.1547			Mean	8.06085	10.5681
6.08632	13.2039			S.E.M.	0.535035	0.789063
7.49669	10.5513			S.D.	4.60255	4.10009
4.43327	10.4772			Variance	21.1834	16.8107
6.85836	9.18662			Sum	596.503	285.34
10.927	6.90167			N	74	27
9.37253	6.98695
13.7365	7.42395			Grand Mean	8.73111
3.88978	#REF!			Total N	101
3.86271	8.45113
4.28634	7.8424			Errors Estimates
3.66646	#REF!			SS(E)	1983.47
4.82249	#REF!			Df(E)	99
2.55975	7.05668			Var(E)	20.035
1.18596	6.74196			SE(E)	4.47605
2.56378	9.07759
4.0637	6.92311			t-Table	Upper Right: tij (Test Statistics between i and j groups); Lower Left: P-Values (Studentized Range Distribution)
5.50686	#REF!
2.89085	5.00509				eau		4d22
2.24781	7.14429			eau			2.49142	* (P<=0.05)
12.3044	5.45574			4d22	0.01439
13.3724	11.6882
13.5169	14.756
9.69122
3.35527
4.23156
7.10225
6.14318
4.15987
3.18689
10.7562
12.0302
9.44735
14.1909
4.4874
4.55908
3.26587
4.3727
4.28467
5.88754
10.122
9.97888
12.4679
11.9083
11.0659
12.8032
11.0083
8.15457
11.4956
13.984
12.1977
15.3191
25.6285
11.5475
12.9759
12.5846
13.412
9.82287
9.69236
3.75396
4.47099
6.83578
18.1015
13.7111
11.7407
6.05187
3.35581
4.89262
2.39205
6.76683
eau	delfin
4.40718	7.261			Tukey-Kramer Test: Pairwise Comparisons for One-Way Layout Design
10.3958	5.6233
5.12579	14.0312				eau	delfin
4.47704	9.47879			Mean	8.06085	7.52911
3.05174	5.6546			S.E.M.	0.535035	0.519773
6.08632	7.74405			S.D.	4.60255	3.74814
7.49669	7.28501			Variance	21.1834	14.0485
4.43327	11.0082			Sum	596.503	391.514
6.85836	5.52636			N	74	52
10.927	5.63025
9.37253	18.087			Grand Mean	7.8414
13.7365	7.36175			Total N	126
3.88978	5.75422
3.86271	4.67935			Errors Estimates
4.28634	3.78662			SS(E)	2262.87
3.66646	2.7673			Df(E)	124
4.82249	5.33641			Var(E)	18.2489
2.55975	2.77981			SE(E)	4.27187
1.18596	3.28028
2.56378	4.92741			t-Table	Upper Right: tij (Test Statistics between i and j groups); Lower Left: P-Values (Studentized Range Distribution)
4.0637	13.7843
5.50686	8.64776				eau		delfin
2.89085	5.1514			eau			-0.687883	Not Significant (P>0.05)
2.24781	13.4109			delfin	0.4928
12.3044	10.5016
13.3724	10.7896
13.5169	4.41802
9.69122	2.32037
3.35527	2.82543
4.23156	11.5843
7.10225	6.14753
6.14318	9.04299
4.15987	7.39857
3.18689	1.73404
10.7562	13.2603
12.0302	3.26908
9.44735	0.619232
14.1909	9.16438
4.4874	6.8687
4.55908	5.70895
3.26587	10.1759
4.3727	6.61308
4.28467	12.1958
5.88754	13.886
10.122	9.27232
9.97888	10.3166
12.4679	7.78225
11.9083	11.7032
11.0659	6.15975
12.8032	4.67533
11.0083	8.53434
8.15457	5.54863
11.4956
13.984
12.1977
15.3191
25.6285
11.5475
12.9759
12.5846
13.412
9.82287
9.69236
3.75396
4.47099
6.83578
18.1015
13.7111
11.7407
6.05187
3.35581
4.89262
2.39205
6.76683
eau	cristaux
4.40718	6.0481			Tukey-Kramer Test: Pairwise Comparisons for One-Way Layout Design
10.3958	8.74528
5.12579	3.77037				eau	cristaux
4.47704	4.05943			Mean	8.06085	5.46344
3.05174	2.86185			S.E.M.	0.535035	0.57335
6.08632	2.38236			S.D.	4.60255	3.08759
7.49669	3.90316			Variance	21.1834	9.53319
4.43327	7.68328			Sum	596.503	158.44
6.85836	2.4167			N	74	29
10.927	2.89453
9.37253	3.26904			Grand Mean	7.32954
13.7365	4.7493			Total N	103
3.88978	1.83268
3.86271	4.94663			Errors Estimates
4.28634	5.97834			SS(E)	1813.32
3.66646	6.41289			Df(E)	101
4.82249	6.02399			Var(E)	17.9537
2.55975	13.0438			SE(E)	4.23718
1.18596	5.33854
2.56378	3.37663			t-Table	Upper Right: tij (Test Statistics between i and j groups); Lower Left: P-Values (Studentized Range Distribution)
4.0637	3.22399
5.50686	6.79496				eau		cristaux
2.89085	11.0784			eau			-2.79808	** (P<=0.01)
2.24781	13.1794			cristaux	0.006159
12.3044	2.87667
13.3724	4.29747
13.5169	9.68483
9.69122	3.88125
3.35527	3.68581
4.23156
7.10225
6.14318
4.15987
3.18689
10.7562
12.0302
9.44735
14.1909
4.4874
4.55908
3.26587
4.3727
4.28467
5.88754
10.122
9.97888
12.4679
11.9083
11.0659
12.8032
11.0083
8.15457
11.4956
13.984
12.1977
15.3191
25.6285
11.5475
12.9759
12.5846
13.412
9.82287
9.69236
3.75396
4.47099
6.83578
18.1015
13.7111
11.7407
6.05187
3.35581
4.89262
2.39205
6.76683

## Sheet: stat rfp+pros+
eau	4d22
0	#REF!
0	0		Tukey-Kramer Test: Pairwise Comparisons for One-Way Layout Design
0	#REF!
0	0.548703			eau	4d22
0	1.48997		Mean	0.602519	0.937366
2.02877	1.20035		S.E.M.	0.13123	0.320234
3.40758	0		S.D.	1.12889	1.66399
1.26665	0		Variance	1.27438	2.76885
1.87046	1.22488		Sum	44.5864	25.3089
0	0		N	74	27
0	0
0	0		Grand Mean	0.692032
0	#REF!		Total N	101
1.28757	0
3.57195	0.603262		Errors Estimates
0.611076	#REF!		SS(E)	165.02
0	#REF!		Df(E)	99
0	1.17611		Var(E)	1.66687
0.592982	0		SE(E)	1.29107
0	0
0.677284	0		t-Table	Upper Right: tij (Test Statistics between i and j groups); Lower Left: P-Values (Studentized Range Distribution)
3.05937	#REF!
1.15634	0.625636			eau		4d22
0	0		eau			1.15354	Not Significant (P>0.05)
0	1.36393		4d22	0.2515
0	0
0	0.670727
0
2.68422
3.62705
2.58264
0
0
0
0
0
0
0
0
0
0
0
0
0
0
0
0
0.916024
0
4.26773
0
0
3.28446
1.33181
0.641983
0.696321
0
3.46426
0.720881
0.83897
0
0
0
0
0
0
0
0
0
0
0
0
0
0
eau	delfin		Tukey-Kramer Test: Pairwise Comparisons for One-Way Layout Design
0	5.02685
0	10.6843			eau	delfin
0	17.2201		Mean	0.602519	9.28577
0	11.2561		S.E.M.	0.13123	0.691859
0	8.48189		S.D.	1.12889	4.98907
2.02877	7.09871		Variance	1.27438	24.8908
3.40758	3.36231		Sum	44.5864	482.86
1.26665	4.63502		N	74	52
1.87046	3.68424
0	2.81513		Grand Mean	4.18608
0	10.1739		Total N	126
0	9.6269
0	16.1118		Errors Estimates
1.28757	20.2772		SS(E)	1362.46
3.57195	18.9331		Df(E)	124
0.611076	14.39		Var(E)	10.9876
0	6.40369		SE(E)	3.31475
0	4.44769
0.592982	4.3737		t-Table	Upper Right: tij (Test Statistics between i and j groups); Lower Left: P-Values (Studentized Range Distribution)
0	2.18996
0.677284	3.93837			eau		delfin
3.05937	10.9538		eau			14.4765	*** (P<=0.001)
1.15634	10.3028		delfin	1.399e-06
0	3.4985
0	6.07985
0	2.3977
0	6.31146
0	3.48056
2.68422	1.69526
3.62705	13.9012
2.58264	7.26526
0	2.82594
0	14.1806
0	11.5603
0	14.3654
0	15.2557
0	15.4808
0	4.00942
0	13.7374
0	10.2761
0	3.39198
0	15.4305
0	11.554
0	9.05608
0	16.8061
0	9.67184
0	7.78225
0.916024	9.23934
0	11.1996
4.26773	8.18183
0	13.4111
0	14.4264
3.28446
1.33181
0.641983
0.696321
0
3.46426
0.720881
0.83897
0
0
0
0
0
0
0
0
0
0
0
0
0
0
eau	cristaux			Tukey-Kramer Test: Pairwise Comparisons for One-Way Layout Design
0	19.7938
0	11.2439				eau	cristaux
0	15.7099			Mean	0.602519	18.6354
0	24.9365			S.E.M.	0.13123	1.07639
0	19.4606			S.D.	1.12889	5.79655
2.02877	27.3971			Variance	1.27438	33.6
3.40758	15.0551			Sum	44.5864	540.428
1.26665	20.6857			N	74	29
1.87046	18.7295
0	8.10469			Grand Mean	5.67975
0	30.511			Total N	103
0	15.4352
0	23.2139			Errors Estimates
1.28757	15.4582			SS(E)	1033.83
3.57195	23.3155			Df(E)	101
0.611076	13.4088			Var(E)	10.2359
0	10.9527			SE(E)	3.19937
0	19.5657
0.592982	14.8293			t-Table	Upper Right: tij (Test Statistics between i and j groups); Lower Left: P-Values (Studentized Range Distribution)
0	13.5065
0.677284	9.02718				eau		cristaux
3.05937	24.7089			eau			25.7275	*** (P<=0.001)
1.15634	26.8213			cristaux	1.407e-06
0	23.064
0	24.7394
0	21.4873
0	15.1326
0	13.8616
2.68422	20.272
3.62705
2.58264
0
0
0
0
0
0
0
0
0
0
0
0
0
0
0
0
0.916024
0
4.26773
0
0
3.28446
1.33181
0.641983
0.696321
0
3.46426
0.720881
0.83897
0
0
0
0
0
0
0
0
0
0
0
0
0
0

## Sheet: grpahe prospero 
	pros+ RFP-		Pros+ RFP+
H2O	8.79567		0.468389
4d22	8.52486		0.793887
delfin	7.93415		9.29164
Crystals	5.64604		18.677
