# Supplementary material for: Bacillus thuringiensis toxins divert progenitor cells toward enteroendocrine fate by decreasing cell adhesion with intestinal stem cells in Drosophila
Source: eLife journal article supplement (doi:10.7554/elife.80179), 2023-02-06
Supplement: fig3-data1 [file 3G Comptage des EC.xlsx]

## Sheet: EC H2O
intestin	surface	photos	RFp+ dapi+		RFP- Dapi +				lineage cellulaire 181219
1	33123.1	un64	0	0	112	67.6266
2	27555.3	un76	0	0	77	55.8875
3	28463.3	un83	0	0	100	70.266
4	39377.3	un90	0	0	118	59.9329
5	39893.5	un97	0	0	99	49.6321
6	36330.8	un104	0	0	113	62.2062
7	29420.6	un111	2	1.35959	106	72.0585
8	35559.2	un118	0	0	121	68.0556
9	36210.4	un125	0	0	128	70.6979
10	29441.3	un132	0	0	114	77.4421
11	25612.3	un139	0	0	123	96.0475
12	20423.2	un146	0	0	97	94.9902
13	32101.3	un153	0	0	96	59.8106
14	32716.4	un160	0	0	100	61.1313
15	32462.5	un167	0	0	99	60.9934
16	26711	un195	2	1.49751	58	43.4278
21	32622.5	un223	0	0	90	55.1766
22	29904.3	un230	0	0	78	52.1663
23	34832.6	un237	0	0	90	51.6757
24	34162.2	un244	0	0	111	64.984									#REF!
25	20203.2	un260	0	0	93	92.0647									#REF!
26	23264.5	un267	0	0	105	90.2662
27	27038.4	un274	0	0	123	90.9816									77.7421
28	29028	un281	0	0	120	82.6789									#REF!
29	31817.6	un288	0	0	116	72.9156
30	31684.1	un295	2	1.26246	107	67.5418
31	29738	un302	2	1.34508	106	71.2893
32	30221.8	un309	0	0	107	70.8099
33	29715.2	un316	0	0	102	68.6517
34	29147.7	un323	0	0	105	72.0469
1	20203.6	un144	0	0	83	82.1637			lineage cellulaire 201219
2	21417.5	un151	0	0	81	75.6391
3	23354.3	un158	0	0	74	63.3716
4	25934.7	un165	0	0	88	67.8627
7	28740	un272	1	0.695894	177	123.173
8	32313.1	un200	0	0	98	60.6565
9	29192.6	un214	0	0	105	71.9362
10	25966.7	un221	0	0	101	77.7919
11	26749.6	un228	0	0	99	74.0199
12	27374.4	un235	0	0	106	77.4446
13	24523.6	un242	0	0	91	74.2144
14	21102.6	un249	0	0	89	84.35
15	24172	un263	0	0	103	85.2226
16	22015.2	un279	0	0	135	122.643
17	26118.2	un286	0	0	140	107.205
18	27061.3	un293	6	4.43437	116	85.7312
1	26676.3	un416	1	0.749731	107	80.2212			lineage cellulaire 3j eau 2 060120
2	29274.4	un423	1	0.683192	126	86.0822
3	27743.9	un430	0	0	129	92.9934
4	22323.6	un437	5	4.47956	122	109.301
6	23229.1	un458	0	0	142	122.26
7	23276.4	un465	0	0	153	131.463
8	28707.2	un472	0	0	163	113.56
9	29060.2	un479	0	0	151	103.922
10	32085.5	un486	0	0	87	54.2302
12	35366.7	un507	0	0	125	70.688
13	33637.3	un514	0	0	134	79.6736
1	22247.2	un342	1	0.898991	98	88.1011			lineage cellulaire 3j eau 060120
2	30770	un349	0	0	128	83.1979
3	32084.2	un367	0	0	102	63.5826
6	36007.8	un388	0	0	113	62.7642
7	34243.3	un395	0	0	118	68.9187
8	34288.5	un402	1	0.583286	137	79.9102
				0.28555		77.7421

## Sheet: EC 4D22
intestin	surface	photos	RFP+dapi+		RFP-Dapi+		Total EC		250619		DONE
1	30399.2	un692	7	4.60539	67	44.0802	48.6856
2	30175.1	un701	10	6.62798	46	30.4887	37.1167					5.1526		46.716
3	35403.7	un710	8	4.5193	63	35.5895	40.1088					4.86309		53.8645
4	34180.8	un719	7	4.09587	69	40.3736	44.4694					21.2195		66.616
5	27959.8	un728	12	8.58375	55	39.3422	47.9259					10.4117		55.7322
6	34750.1	un737	0	0	60	34.5323	34.5323
7	33863.6	un754	9	5.31544	125	73.8256	79.141
8	31274	un763	10	6.39509	111	70.9855	77.3806
9	35211.4	un790	7	3.97599	94	53.3919	57.3678
10	33201.6	un799	0	0	65	39.1547	39.1547
11	32873.2	un810	8	4.86718	72	43.8046	48.6718
12	29333.2	un819	15	10.2273	101	68.8638	79.0911
13	33459.7	un836	13	7.77054	55	32.8754	40.6459
				5.1526		46.716	51.8686
intestin	surface	photos	RFP+dapi+		RFP-Dapi+				130721
1	35637.1	un60	0	0	83	46.5806	46.5806				DONE
2	35907.9	un67	3	1.67094	83	46.2294	47.9003
3	32987.6	un78	2	1.21258	81	49.1093	50.3219
4	36014	un85	7	3.88738	109	60.532	64.4194
5	31485	un92	23	14.6102	123	78.1326	92.7427
6	34924.8	un106	5	2.86329	71	40.6588	43.5221
7	35763.5	un113	6	3.35538	81	45.2976	48.653
8	35373.7	un120	3	1.69617	73	41.2735	42.9697
9	36003.8	un127	0	0	67	37.2183	37.2183
10	34328.1	un134	7	4.07829	82	47.7742	51.8525
11	32955.9	un144	10	6.06871	67	40.6603	46.7291
12	32388	un151	15	9.26268	109	67.3088	76.5715
13	28034.3	un158	16	11.4146	101	72.0546	83.4691
14	29640.7	un170	15	10.1212	75	50.6062	60.7274
15	29574.9	un177	4	2.70499	125	84.5311	87.236
				4.86309		53.8645
intestin	surface	photos	rfp+dapi+		rfp-dapi+				150621
1	34731.6	un304	47	27.0647	170	97.8937	124.958				DONE
2	36149.7	un311	33	18.2574	99	54.7722	73.0296
3	34308.8	un325	18	10.4929	115	67.0382	77.5312
4	37822	un332	37	19.5654	95	50.2354	69.8007
5	35159.7	un339	54	30.717	111	63.1404	93.8574
				21.2195		66.616
intestin									260219
1	33833	un2	27	15.9607	99	58.5227	74.4835				DONE
2	33233	un558	32	19.258	119	71.6156	90.8735
3	34295	un339	53	30.9083	136	79.3119
intestin									180619		DONE
1	36801	un511	7	3.80424	136	73.911	77.7153
2	13685	un533	8	11.6916	37	54.0738	65.7654

## Sheet: EC Delfin
intestin	surface	photos	rfp+dapi+		rfp-dapi+		E+F	lineage 3j dipel 181219
1	34909.6	un365	41	23.4892	79	45.2598	68.749				#REF!	#REF!
2	34052.3	un372	33	19.3819	53	31.1286	50.5105				#REF!	#REF!
3	33949.1	un379	35	20.6191	106	62.4465	83.0656				19.3169	37.6356
4	34672	un386	33	19.0355	60	34.61	53.6455				#REF!	#REF!
5	31562.6	un393	13	8.23761	90	57.0296	65.2672
6	33215.8	un400	13	7.82759	94	56.5995	64.4271
7	33204.3	un407	5	3.01166	98	59.0285	62.0402
1	31699.5	un41	12	7.57111	50	31.5463	39.1174		lineage 191219
2	32875.9	un48	6	3.65009	67	40.7594	44.4095
3	32088.6	un55	64	39.8896	84	52.3551	92.2447
4	31340.5	un83	50	31.9076	12	7.65781	39.5654
5	33602.4	un90	46	27.379	41	24.403	51.7819
6	34784.2	un97	42	24.1489	32	18.3991	42.548
7	32692.2	un104	35	21.4119	36	22.0236	43.4355
8	32985	un111	48	29.1041	42	25.4661	54.5702
9	32906.9	un118	17	10.3322	85	51.6609	61.993
10	34106.6	un125	8	4.69118	95	55.7077	60.3989
11	34121.1	un132	5	2.93074	88	51.581	54.5118
12	32975.1	un146	5	3.03259	75	45.4888	48.5214
13	26238.4	un179	22	16.7693	144	109.763	126.532
14	32248.3	un186	43	26.668	82	50.8553	77.5234
15	33426.9	un193	36	21.5395	40	23.9328	45.4724
16	31713.1	un228	21	13.2438	75	47.2991	60.5429
17	31690.9	un235	50	31.5548	27	17.0396	48.5944
18	32365.9	un242	50	30.8968	13	8.03316	38.9299
19	32648.5	un249	20	12.2517	46	28.179	40.4307
20	32432	un256	11	6.78342	52	32.0671	38.8505
22	32660.1	un314	20	12.2473	92	56.3378	68.5851
23	33710.2	un328	24	14.239	57	33.8176	48.0566
24	33348.6	un342	4	2.3989	103	61.7717	64.1706
25	31261	un407	37	23.6717	77	49.2627	72.9343
26	33209.5	un414	36	21.6806	50	30.1119	51.7925
27	36123.7	un442	34	18.8242	34	18.8242	37.6484
28	35572.8	un454	36	20.2402	23	12.9312	33.1714
1	32627.9	un326	33	20.2281	82	50.2638	70.4919		lineage 201219
2	32354.3	un333	47	29.0534	13	8.03604	37.0894
3	34209.1	un340	29	16.9546	31	18.1239	35.0784
4	33936.2	un347	20	11.7868	52	30.6458	42.4326
5	30097.9	un373	63	41.8633	20	13.29	55.1533
6	32741.7	un387	33	20.1578	112	68.4142	88.572
7	33736.7	un394	41	24.3059	74	43.8692	68.175
8	31038.1	un415	65	41.8841	35	22.553	64.437
9	26928.5	un422	64	47.5332	32	23.7666	71.2998
10	32879	un429	41	24.9399	35	21.2902	46.2301
11	32741.1	un436	18	10.9953	87	53.1442	64.1395
12	33253	un443	25	15.0362	72	43.3044	58.3406
13	35674.9	un457	34	19.061	68	38.122	57.183
14	36045	un464	41	22.7494	33	18.3105	41.0598
				19.3169		37.6356	56.9525

## Sheet: EC Cristaux
intestin	surface	photos	rfp+dapi+		rfp-dapi+		E+F	250619
1	35387.7	un158	16	9.04268	124	70.0808	79.1235
3	35054.8	un172	20	11.4107	75	42.7902	54.2009
4	33045.4	un181	9	5.44706	36	21.7882
5	33980.8	un188	20	11.7714	37	21.777
6	29851.2	un195	14	9.37986	51	34.1695	43.5493
7	33742.1	un211	14	8.29824	58	34.3784	42.6767
8	35973.5	un218	5	2.77983	46	25.5744
9	34567.7	un225	16	9.2572	51	29.5073
10	34829.5	un235	15	8.61339	74	42.4927	51.1061
11	32934.6	un242	14	8.50169	99	60.1191	68.6208
12	34698.4	un249	27	15.5627	55	31.7018	47.2645
13	30977.7	un256	15	9.68438	81	52.2957	61.98
14	33351.8	un269	36	21.5881	64	38.3788	59.9668
15	34900.3	un276	14	8.02286	45	25.7878
16	34010.4	un290	16	9.4089	65	38.2237	47.6326
1	29847.5	un210	21	14.0716	144	96.4906	110.562	130721
2	35601.4	un226	48	26.9652	55	30.8976	57.8629
3	34940	un233	29	16.5999	78	44.6479	61.2478
4	25518.2	un247	12	9.40506	60	47.0253	56.4304
5	34260.5	un254	20	11.6752	41	23.9343
6	28519.7	un281	16	11.2203	64	44.8812	56.1015
7	33952.8	un288	10	5.89053	58	34.1651	40.0556
8	32402	un295	13	8.0242	38	23.4554
9	30059.2	un306	10	6.65353	104	69.1967	75.8502
10	32780.3	un313	37	22.5746	91	55.5212	78.0957
11	33480.3	un322	24	14.3368	50	29.8683	44.2051
				11.3918		41.1211	59.8175

## Sheet: Compil
	H2O				4D22				SA11					Cristaux
	RFP- Dapi +	RFp+ dapi+	Total EC		RFP- Dapi +	RFp+ dapi+	Total EC		RFP- Dapi +	RFp+ dapi+	Total EC			RFP- Dapi +	RFp+ dapi+	Total EC
	67.6266	0	67.6266		73.8256	5.31544	79.141		45.2598	23.4892	68.749			70.0808	9.04268	79.1235
	55.8875	0	55.8875		70.9855	6.39509	77.3806		31.1286	19.3819	50.5105			42.7902	11.4107	54.2009
	70.266	0	70.266		53.3919	3.97599	57.3678		62.4465	20.6191	83.0656			21.7882	5.44706	27.2353
	59.9329	0	59.9329		68.8638	10.2273	79.0911		34.61	19.0355	53.6455			21.777	11.7714	33.5484
	49.6321	0	49.6321		60.532	3.88738	64.4194		57.0296	8.23761	65.2672			34.1695	9.37986	43.5493
	62.2062	0	62.2062		78.1326	14.6102	92.7427		56.5995	7.82759	64.4271			34.3784	8.29824	42.6767
	72.0585	1.35959	73.418		67.3088	9.26268	76.5715		59.0285	3.01166	62.0402			25.5744	2.77983	28.3542
	68.0556	0	68.0556		72.0546	11.4146	83.4691		31.5463	7.57111	39.1174			29.5073	9.2572	38.7645
	70.6979	0	70.6979		50.6062	10.1212	60.7274		40.7594	3.65009	44.4095			42.4927	8.61339	51.1061
	77.4421	0	77.4421		84.5311	2.70499	87.236		52.3551	39.8896	92.2447			60.1191	8.50169	68.6208
	96.0475	0	96.0475		97.8937	27.0647	124.958		7.65781	31.9076	39.5654			31.7018	15.5627	47.2645
	94.9902	0	94.9902		54.7722	18.2574	73.0296		24.403	27.379	51.7819			52.2957	9.68438	61.98
	59.8106	0	59.8106		67.0382	10.4929	77.5312		51.6609	10.3322	61.993			38.3788	21.5881	59.9668
	61.1313	0	61.1313		50.2354	19.5654	69.8007		55.7077	4.69118	60.3989			25.7878	8.02286	33.8106
	60.9934	0	60.9934		63.1404	30.717	93.8574		51.581	2.93074	54.5118			38.2237	9.4089	47.6326
	43.4278	1.49751	44.9253		58.5227	15.9607	74.4835		45.4888	3.03259	48.5214			30.8976	26.9652	57.8629
	55.1766	0	55.1766		71.6156	19.258	90.8735		50.8553	26.668	77.5234			44.6479	16.5999	61.2478
	52.1663	0	52.1663		79.3119	30.9083	110.22		23.9328	21.5395	45.4724			47.0253	9.40506	56.4304
	51.6757	0	51.6757		73.911	3.80424	77.7153		47.2991	13.2438	60.5429			23.9343	11.6752	35.6095
	64.984	0	64.984		54.0738	11.6916	65.7654		28.179	12.2517	40.4307			44.8812	11.2203	56.1015
	92.0647	0	92.0647		67.5373	13.2818	80.8191		32.0671	6.78342	38.8505			34.1651	5.89053	40.0556
	90.2662	0	90.2662						56.3378	12.2473	68.5851			23.4554	8.0242	31.4796
	90.9816	0	90.9816						33.8176	14.239	48.0566			69.1967	6.65353	75.8502
	82.6789	0	82.6789						61.7717	2.3989	64.1706			55.5212	22.5746	78.0957
	72.9156	0	72.9156						49.2627	23.6717	72.9343			29.8683	14.3368	44.2051
	67.5418	1.26246	68.8043						30.1119	21.6806	51.7925			38.9063	11.2846	50.1909
	71.2893	1.34508	72.6343						50.2638	20.2281	70.4919		MOYENNE
	70.8099	0	70.8099						30.6458	11.7868	42.4326
	68.6517	0	68.6517						68.4142	20.1578	88.572
	72.0469	0	72.0469						43.8692	24.3059	68.175
	82.1637	0	82.1637						53.1442	10.9953	64.1395
	75.6391	0	75.6391						43.3044	15.0362	58.3406
	63.3716	0	63.3716						38.122	19.061	57.183
	67.8627	0	67.8627					MOYENNE	43.8988	15.4328	59.3316
	60.6565	0	60.6565
	71.9362	0	71.9362
	77.7919	0	77.7919
	74.0199	0	74.0199
	77.4446	0	77.4446
	74.2144	0	74.2144
	84.35	0	84.35
	85.2226	0	85.2226
	107.205	0	107.205
	85.7312	4.43437	90.1655
	80.2212	0.749731	80.9709
	86.0822	0.683192	86.7654
	92.9934	0	92.9934
	54.2302	0	54.2302
	70.688	0	70.688
	79.6736	0	79.6736
	88.1011	0.898991	89.0001
	83.1979	0	83.1979
	63.5826	0	63.5826									Mann & Whitney				Mann & Whitney
	62.7642	0	62.7642					n	Old	Ecart Type	SEM	STAT vs H2O	New	Ecart Type	SEM	STAT vs H2O
	68.9187	0	68.9187				H2O	56	72.7041	13.4905	1.80274		0.228825	0.751221	0.100386
	79.9102	0.583286	80.4935				4D22	20	67.5373	12.2954	2.74933	ns	13.2818	8.73662	1.95357	***
MOYENNE	72.7041	0.228825	72.9329				SA11	33	43.8988	13.6052	2.36836	***	15.4328	9.28812	1.61685	***
							Crystals	25	38.9063	14.0068	2.80137	***	11.2846	5.62798	1.1256	***

## Sheet: %
			rfp-DAPI+	rfp+DAPI+	Total DAPI +	% old EC	% new EC
		eau	72.7041	0.228825	72.9329	99.6863	0.313748
		4d22	67.5373	13.2818	80.8191	83.5661	16.4339
		dipel	43.8988	15.4328	59.3316	73.9889	26.0111
		cristaux	38.9063	11.2846	50.1909	77.5167	22.4833
