# Supplementary material for: Bacillus thuringiensis toxins divert progenitor cells toward enteroendocrine fate by decreasing cell adhesion with intestinal stem cells in Drosophila
Source: eLife journal article supplement (doi:10.7554/elife.80179), 2023-02-06
Supplement: fig3-figsupp1-data1 [file Figure 3 fig sup 1C.xlsx]

## Sheet: EB 3j SA11 
intestin	surface	Pros +			dipel 060120				compil
1	33892.7	17	UN534	10.0317		10.0317			10.0317
2	27335.5	18	un541	13.1697		13.1697			13.1697
3	27914.2	17	un548	12.1802		12.1802			12.1802
4	25249.2	19	un555	15.05					5.66231
5	28257	8	un562	5.66231		5.66231			9.83247
6	26443	13	un569	9.83247		9.83247			4.81439
7	20771.1	5	un576	4.81439		4.81439			5.32088
8	30070.2	8	un583	5.32088		5.32088			12.8571
9	31111.1	20	un590	12.8571		12.8571			12.5023
10	35193.6	22	un597	12.5023		12.5023			10.6287
11	24462.1	13	un604	10.6287		10.6287			8.01784
12	22449.9	9	un618	8.01784		8.01784			6.77989
13	32448.9	11	un632	6.77989		6.77989			6.6296
				9.75749		9.31645			5.16967
									4.57512
									5.22706
intestin	surface	Pros+			dipel 070120				8.70355
1	30167.7	10	un279	6.6296		6.6296			12.1411
2	30949.7	8	un293	5.16967		5.16967		Moyenne	8.56908
3	30600.3	7	un314	4.57512		4.57512
4	26783.7	7	un321	5.22706		5.22706
5	32418.1	23	un342	14.1896
6	25277.1	11	un349	8.70355		8.70355
7	24709.5	15	un356	12.1411		12.1411
				8.09081		7.07435

## Sheet: EB 3j eau 
intestin	surface	Pros +
1	30641.3	18	UN63	11.7489
2	30170.9	10	UN70	6.62891
3	32709	8	UN77	4.89162
4	27886.5	4	UN84	2.86877
5	30817.7	14	UN98	9.0857
6	32121.3	8	UN105	4.98112
7	28307.3	15	UN112	10.598
8	23038.6	3	UN119	2.60432
9	26609.3	22	UN126	16.5356
10	31756.7	20	UN133	12.5958
11	30830.8	12	UN140	7.78443
12	32920.8	15	UN147	9.11279
13	31801.8	15	UN154	9.43342
14	33671.8	8	UN161	4.75175
15	32164.8	8	UN175	4.97438
16	29117.4	6	UN206	4.12125
17	32460.5	8	UN213	4.92907
18	35895.1	8	UN220	4.45744
19	31035.2	7	UN227	4.51101
20	30213.5	4	UN234	2.64783
21	30498.2	10	UN241	6.55776
22	21902.1	6	UN255	5.47892
23	33615.9	5	UN262	2.97478
			Moyenne	6.70754

## Sheet: Graph
			H2O	SA11
		RFP- pros+	6.70754	8.56908
		rfp+pros+	0	0
		n	H2O Pros+ RFP-	Dipel Pros+ RFP-
		1	11.7489	10.0317
		2	6.62891	13.1697
		3	4.89162	12.1802
		4	2.86877	5.66231
		5	9.0857	9.83247
		6	4.98112	4.81439
		7	10.598	5.32088
		8	2.60432	12.8571
		9	16.5356	12.5023
		10	12.5958	10.6287
		11	7.78443	8.01784
		12	9.11279	6.77989
		13	9.43342	6.6296
		14	4.75175	5.16967
		15	4.97438	4.57512
		16	4.12125	5.22706
		17	4.92907	8.70355
		18	4.45744	12.1411
		19	4.51101
		20	2.64783
		21	6.55776
		22	5.47892
		23	2.97478
		Moyenne	6.70754	8.56908
		n	23	18
		Ecart Type	3.61949	3.1423
		SEM	0.754715	0.740648
		mann_et_whitney		*
