# Supplementary material for: Bacillus thuringiensis toxins divert progenitor cells toward enteroendocrine fate by decreasing cell adhesion with intestinal stem cells in Drosophila
Source: eLife journal article supplement (doi:10.7554/elife.80179), 2023-02-06
Supplement: fig3-figsupp1-data1 [file Figure 3 fig sup 1D.xlsx]

## Sheet: EC eau 
intestin	surface	photos	rfp-		rfp+						RFP-			RFP+
1	31822.9	un70	116	72.9034	0	0					72.9034	72.9034		0		0
2	29440.3	un77	121	82.2003	0	0					82.2003	82.2003		0		0
3	33758.8	un98	100	59.2438	12	7.10925					59.2438			7.10925
4	32428	un105	157	96.83	6	3.70051					96.83	96.83		3.70051		3.70051
5	31271.8	un112	114	72.9091	6	3.83732					72.9091	72.9091		3.83732		3.83732
6	28479	un119	65	45.6477	22	15.45					45.6477			15.45
7	29821.2	un126	102	68.4077	7	4.69465					68.4077	68.4077		4.69465		4.69465
8	29624.5	un140	67	45.2328	9	6.07605					45.2328			6.07605
9	35463.7	un147	144	81.2098	15	8.45936					81.2098			8.45936
10	30858.6	un154	160	103.699	1	0.648117					103.699	103.699		0.648117		0.648117
11	33062.6	un161	163	98.6008	1	0.604913					98.6008	98.6008		0.604913		0.604913
12	32718.6	un175	96	58.6822	3	1.83382					58.6822	58.6822		1.83382		1.83382
13	32400.9	un206	104	64.1957	2	1.23453					64.1957	64.1957		1.23453		1.23453
14	34719.2	un213	91	52.4206	0	0					52.4206	52.4206		0		0
15	32617.4	un220	106	64.9959	0	0					64.9959	64.9959		0		0
16	33434.2	un227	93	55.6316	0	0					55.6316	55.6316		0		0
17	35206.7	un234	107	60.784	1	0.568074					60.784	60.784		0.568074		0.568074
18	33212.9	un241	104	62.6262	3	1.80652					62.6262	62.6262		1.80652		1.80652
19	25498.7	un255	65	50.9831	1	0.784355					50.9831	50.9831		0.784355		0.784355
20	35140.7	un262	98	55.7758	1	0.569141					55.7758	55.7758		0.569141		0.569141
21	28574.2	un84	111	77.6926	1	0.699933					77.6926	77.6926		0.699933		0.699933
				68.1272		2.76555					68.1272	70.5493		2.76555		1.23423

## Sheet: EC SA11 
intestin	surface	photos	rfp-		rfp+
1	25644.3	un534	101	78.7699	16	12.4784
2	28763	un541	114	79.2685	10	6.95338
3	30010.4	un548	120	79.9723	22	14.6616
4	30589.4	un555	117	76.497	37	24.1914
5	30609.5	un562	130	84.941	8	5.22714
6	26935.6	un569	109	80.9337	7	5.19758
7	22190.2	un576	92	82.9196	5	4.5065
8	29573.2	un583	151	102.12	10	6.76289
9	29205.7	un590	146	99.9805	29	19.8591						80.0384		12.2129
10	30143.7	un597	103	68.3393	20	13.2698						66.7326		8.02525
11	29611.2	un604	80	54.0336	44	29.7185						73.3855		10.1191
12	22459.6	un618	58	51.6482	10	8.90487
13	31263.4	un632	158	101.077	11	7.03697
				80.0384		12.2129
1	32630.2	un279	137	83.9714	6	3.67758
2	34058.3	un293	108	63.4207	8	4.69783
3	31760.9	un314	69	43.4496	15	9.44557
4	30604.4	un321	95	62.0827	9	5.88152
5	32814.8	un342	117	71.3092	21	12.7991
6	28932.3	un349	112	77.4223	16	11.0603
7	23215.8	un356	76	65.4726	10	8.61482
				66.7326		8.02525

## Sheet: graphe EC 
	RFP-	RFP+	SEM RFP-	SEM RFP+	n
H2O	68.1272	2.76555	3.67768	0.842694	21		H2O				SA11
SA11	75.3814	10.7472	3.55746	1.55327	20		rfp- (Old)	rfp+ (New)	EC Total		rfp- (Old)	rfp+ (New)	EC Total
						1	72.9034	0	72.9034		78.7699	12.4784	91.2483
						2	82.2003	0	82.2003		79.2685	6.95338	86.2219
						3	59.2438	7.10925	66.353		79.9723	14.6616	94.6339
						4	96.83	3.70051	100.53		76.497	24.1914	100.688
						5	72.9091	3.83732	76.7464		84.941	5.22714	90.1681
						6	45.6477	15.45	61.0977		80.9337	5.19758	86.1313
						7	68.4077	4.69465	73.1024		82.9196	4.5065	87.4261
						8	45.2328	6.07605	51.3089		102.12	6.76289	108.883
						9	81.2098	8.45936	89.6692		99.9805	19.8591	119.84
						10	103.699	0.648117	104.347		68.3393	13.2698	81.6091
						11	98.6008	0.604913	99.2057		54.0336	29.7185	83.752
						12	58.6822	1.83382	60.516		51.6482	8.90487	60.5531
						13	64.1957	1.23453	65.4303		101.077	7.03697	108.113
						14	52.4206	0	52.4206		83.9714	3.67758	87.649
						15	64.9959	0	64.9959		63.4207	4.69783	68.1185
						16	55.6316	0	55.6316		43.4496	9.44557	52.8952
						17	60.784	0.568074	61.352		62.0827	5.88152	67.9642
						18	62.6262	1.80652	64.4327		71.3092	12.7991	84.1083
						19	50.9831	0.784355	51.7674		77.4223	11.0603	88.4826
						20	55.7758	0.569141	56.3449		65.4726	8.61482	74.0874
						21	77.6926	0.699933	78.3925		75.3814	10.7472	86.1286
						Moyenne	68.1272	2.76555	70.8928
						n	21	21			20	20
						Ecart type	16.8533	3.86171			15.9094	6.94644
						SEM	3.67768	0.842694			3.55746	1.55327
						Mann & Whitney					ns	***
