# Supplementary material for: Bacillus thuringiensis toxins divert progenitor cells toward enteroendocrine fate by decreasing cell adhesion with intestinal stem cells in Drosophila
Source: eLife journal article supplement (doi:10.7554/elife.80179), 2023-02-06
Supplement: fig4-data1 [file 4E Comptage force de laison shg-RFP.xlsx]

## Sheet: Feuil1
Shg::RFP
	n	H2O Junction	H2O membrane	H2O Ratio	Pros +			n	4D22 Junction	4D22 membrane	4D22 Ratio	Pros +			n	SA11 Junction	SA11 membrane	SA11 Ratio	Pros +			n	Cristaux Junction	Cristaux membrane	Cristaux Ratio	Pros +
	1	1600	700	2.28571		S		1	1242	848	1.46462		M		1	199	134	1.48507	Yes	M		1	394	310	1.27097	Yes	W
	2	1132	825	1.37212		W		2	1713	756	2.26587		S		2	339	246	1.37805	Yes	W		2	345	170	2.02941		S
	3	1136	796	1.42714		M		3	1389	617	2.25122		S		3	237	124	1.91129		S		3	1102	1408	0.78267	Yes	W
	4	1630	932	1.74893		S		4	1091	568	1.92077		S		4	195	128	1.52344		M		4	946	802	1.17955	Yes	W
	5	1970	1054	1.86907		S		5	667	443	1.50564		M		5	263	139	1.89209		S		5	1108	586	1.89078		S
	6	1897	799	2.37422		S		6	1004	459	2.18736		S		6	309	164	1.88415		S		6	1391	544	2.55699		S
	7	2015	794	2.53778		S		7	796	406	1.96059		S		7	1240	1043	1.18888	Yes	W		7	1403	638	2.19906		S
	8	1852	1044	1.77395		S		8	820	429	1.91142		S		8	1949	857	2.27421		S		8	1267	406	3.12069		S
	9	2300	1588	1.44836		M		9	710	527	1.34725	Yes	W		9	1323	813	1.62731		S		9	1690	417	4.05276		S
	10	1374	923	1.48862		M		10	608	314	1.93631		S		10	1073	774	1.3863		W		10	1082	567	1.90829		S
	11	3407	1865	1.82681		S		11	586	238	2.46218		S		11	757	493	1.5355	Yes	M		11	1752	1032	1.69767		S
	12	2896	1644	1.76156		S		12	548	187	2.93048		S		12	1119	600	1.865		S		12	1274	722	1.76454		S
	13	2923	1327	2.20271		S		13	586	256	2.28906		S		13	970	380	2.55263		S		13	1515	699	2.16738		S
	14	507	407	1.2457	yes	W		14	838	233	3.59657		S		14	1330	817	1.62791		S		14	1257	813	1.54613		M
	15	1168	471	2.47983		S		15	669	221	3.02715		S		15	1404	763	1.8401		S		15	1883	914	2.06018		S
	16	595	529	1.12476	yes	W		16	1085	512	2.11914		S		16	842	643	1.30949	Yes	W		16	1559	879	1.77361		S
	17	690	394	1.75127		S		17	1240	540	2.2963		S		17	491	624	0.786859	Yes	W		17	1633	1005	1.62488		S
	18	885	530	1.66981		S		18	927	683	1.35725	Yes	W		18	927	598	1.55017		M
	19	828	580	1.42759		M		19	1309	450	2.90889		S		19	1027	518	1.98263		S
	20	809	335	2.41493		S		20	1103	688	1.6032		M		20	1231	653	1.88515		S
	21	573	217	2.64055		S		21	2307	817	2.82375		S		21	723	439	1.64692		S
	22	613	246	2.49187		S		22	1135	734	1.54632		M		22	1263	708	1.7839		S
	23	603	376	1.60372	Yes	M		23	1895	632	2.99842		S		23	642	529	1.21361	Yes	W
	24	790	268	2.94776		S		24	1113	591	1.88325		S		24	1454	783	1.85696	Yes	S
	25	789	296	2.66554		S		25	1770	763	2.31979		S		25	670	627	1.06858	Yes	W
	26	657	285	2.30526		S		26	2397	650	3.68769		S		26	1669	746	2.23727		S
	27	932	417	2.23501		S		27	2349	803	2.92528		S		27	1367	621	2.20129		S
	28	2063	841	2.45303		S		28	1767	943	1.87381		S		28	834	771	1.08171	Yes	W
	29	1476	989	1.49242		M		29	969	380	2.55		S		29	1260	865	1.45665		M
	30	744	361	2.06094		S		30	1063	627	1.69537		S		30	1509	877	1.72064		S
	31	1800	491	3.66599		S		31	1489	531	2.80414		S		31	1894	828	2.28744		S
	32	1712	665	2.57444		S		32	2662	712	3.73876		S		32	1425	817	1.74419		S
	33	1893	814	2.32555		S		33	1586	698	2.27221		S		33	717	778	0.921594	Yes	W
	34	1967	1313	1.4981		M		34	1289	673	1.9153		S
	35	640	305	2.09836		S		35	1907	1063	1.79398		S
	36	1099	746	1.47319		M		36	1106	462	2.39394		S
	37	1824	1036	1.76062		S
	weak	<1,4	3	8.10811				weak	<1,4	2	5.55556				weak	<1,4	9	27.2727					weak	<1,4	3	17.6471
	medium	1,4<medium<1,6	8	21.6216				medium	1,4<medium<1,6	4	11.1111				medium	1,4<medium<1,6	5	15.1515					medium	1,4<medium<1,6	1	5.88235
	Strong	1,6<strong	26	70.2703				Strong	1,6<strong	30	83.3333				Strong	1,6<strong	19	57.5758					Strong	1,6<strong	13	76.4706

## Sheet: Graph
	eau	4d22	SA11	cristaux
forte	70.2703	83.3333	57.5758	76.4706
intermediaire	21.6216	11.1111	15.1515	5.88235
faible	8.10811	5.55556	27.2727	17.6471
	100	100	100	100
