# Supplementary material for: Bacillus thuringiensis toxins divert progenitor cells toward enteroendocrine fate by decreasing cell adhesion with intestinal stem cells in Drosophila
Source: eLife journal article supplement (doi:10.7554/elife.80179), 2023-02-06
Supplement: fig4-figsupp1-data1 [file Figure 4 fig sup 1E (cell junction intensity).xlsx]

## Sheet: 1j eau 
intestin								n	Junction	outer membrane	Ratio						%
1								1	1893	956	1.98013	S		weak<1,4		7	0.148936
2								2	1662	887	1.87373	S		1,4<mild<1,6		6	0.12766
3								3	2771	1223	2.26574	S		1,6<strong		34	0.723404
4								4	2191	1285	1.70506	S					1
5								5	2357	1232	1.91315	S
6								6	1565	1006	1.55567	M
7								7	76	62	1.22581	W
8								8	205	70	2.92857	S
9								9	188	60	3.13333	S
10								10	199	122	1.63115	S
11								11	237	129	1.83721	S
12								12	96	80	1.2	W
13								13	195	86	2.26744	S
14								14	109	89	1.22472	W
15								15	213	113	1.88496	S
								16	255	58	4.39655	S
								17	255	70	3.64286	S
								18	3699	1425	2.59579	S
								19	3429	1409	2.43364	S
								20	1093	909	1.20242	W
								21	1796	1053	1.7056	S
								22	924	607	1.52224	M
								23	1341	685	1.95766	S
								24	1516	891	1.70146	S
								25	2017	833	2.42137	S
								26	1965	686	2.86443	S
								27	2145	818	2.62225	S
								28	1344	995	1.35075	W
								29	1140	589	1.93548	S
								30	1074	750	1.432	M
								31	844	878	0.961276	W
								32	1065	602	1.7691	S
								33	1392	822	1.69343	S
								34	813	799	1.01752	W
								35	2191	685	3.19854	S
								36	1451	718	2.02089	S
								37	1548	706	2.19263	S
								38	2143	617	3.47326	S
								39	1245	845	1.47337	M
								40	1934	804	2.40547	S
								41	1867	1191	1.56759	M
								42	1596	1054	1.51423	M
								43	2133	1226	1.7398	S
								44	2149	1280	1.67891	S
								45	2308	1120	2.06071	S
								46	2516	1208	2.08278	S
								47	1507	879	1.71445	S
											#DIV/0!

## Sheet: 1j 4d22
intestin									n	Junction	outer membrane	Ratio						%
1									1	1327	715	1.85594	S		weak<1,4		2	0.0740741
2									2	1137	741	1.53441	M		1,4<mild<1,6		2	0.0740741
3									3	2013	780	2.58077	S		1,6<strong		23	0.851852
4									4	2146	872	2.46101	S
5									5	2915	1107	2.63324	S
6									6	1030	725	1.42069	W
7									7	1214	820	1.48049	W
8									8	1726	700	2.46571	S
9									9	1807	1033	1.74927	S
10									10	1617	782	2.06777	S
11									11	1820	908	2.00441	S
12									12	1326	630	2.10476	S
13									13	2014	869	2.31761	S
14									14	2105	810	2.59877	S
15									15	2372	1421	1.66925	S
16									16	2227	1213	1.83594	S
17									17	2643	1388	1.90418	S
									18	3362	1125	2.98844	S
									19	1646	727	2.2641	S
									20	1238	871	1.42135	M
									21	2217	1076	2.06041	S
									22	2879	925	3.11243	S
									23	1584	949	1.66913	S
									24	2751	1218	2.25862	S
									25	2846	1415	2.01131	S
									26	2586	1388	1.86311	S
									27	2713	1118	2.42665	S

## Sheet: 1j delfin 
intestin									n	Junction	outer membrane	Ratio						%
1									1	1461	1059	1.3796	M		weak<1,4		18	0.352941
2									2	1129	847	1.33294	W		1,4<mild<1,6		10	0.196078
3									3	1593	1471	1.08294	W		1,6<strong		23	0.45098
4									4	1615	830	1.94578	S				51	1
5									5	1771	1097	1.6144	S
6									6	1665	941	1.76939	S
7									7	1951	997	1.95687	S
8									8	1599	1011	1.5816	M
9									9	2211	753	2.93625	S
10									10	2385	961	2.48179	S
11									11	1813	851	2.13043	S
12									12	1284	1065	1.20563	W
13									13	1792	723	2.47856	S
14									14	1734	1040	1.66731	S
15									15	1433	1206	1.18823	W
16									16	1815	1190	1.52521	M
									17	1443	997	1.44734	M
									18	1951	1743	1.11933	W
									19	1690	1449	1.16632	W
									20	1411	1033	1.36592	W
									21	2299	1066	2.15666	S
									22	1955	1739	1.12421	W
									23	1491	908	1.64207	S
									24	1690	1392	1.21408	W
									25	987	835	1.18204	W
									26	2161	1054	2.05028	S
									27	1325	1271	1.04249	W
									28	2296	1544	1.48705	M
									29	2312	988	2.34008	S
									30	2810	1891	1.48599	M
									31	1770	1057	1.67455	S
									32	1520	1047	1.45177	M
									33	1552	1527	1.01637	W
									34	2048	1523	1.34471	W
									35	1294	648	1.99691	S
									36	1434	1164	1.23196	W
									37	1499	690	2.17246	S
									38	1133	1122	1.0098	W
									39	1844	1542	1.19585	W
									40	2079	1291	1.61038	S
									41	2306	1172	1.96758	S
									42	2179	1073	2.03075	S
									43	1389	780	1.78077	S
									44	1311	799	1.6408	S
									45	1922	888	2.16441	S
									46	1705	1163	1.46604	M
									47	1837	1170	1.57009	M
									48	1498	1065	1.40657	M
									49	790	788	1.00254	W
									50	1339	808	1.65718	S
									51	1650	1172	1.40785	W
									52			#DIV/0!

## Sheet: 1j cristaux 
							n	Junction	outer membrane	Ratio						%
							1	1795	718	2.5	S		weak<1,4		21	0.388889
							2	873	612	1.42647	M		1,4<mild<1,6		9	0.166667
							3	896	703	1.27454	W		1,6<strong		24	0.444444
							4	747	588	1.27041	W				54	1
							5	1464	371	3.94609	S
							6	1244	291	4.27491	S
							7	707	435	1.62529	S
							8	1311	842	1.55701	M
							9	936	567	1.65079	S
							10	1303	521	2.50096	S
							11	597	564	1.05851	W
							12	823	482	1.70747	S
							13	629	429	1.4662	M
							14	1255	1114	1.12657	W
							15	1007	802	1.25561	W
							16	1980	510	3.88235	S
							17	1600	673	2.37741	S
							18	1060	1075	0.986047	W
							19	2283	1046	2.1826	S
							20	1381	682	2.02493	S
							21	1475	1048	1.40744	M
							22	664	488	1.36066	W
							23	779	727	1.07153	W
							24	1449	1123	1.29029	W
							25	1379	883	1.56172	M
							26	1652	1017	1.62439	S
							27	1226	998	1.22846	W
							28	1322	674	1.96142	S
							29	2491	543	4.58748	S
							30	1773	791	2.24147	S
							31	1763	1249	1.41153	M
							32	454	466	0.974249	W
							33	1183	969	1.22085	W
							34	1353	782	1.73018	S
							35	1352	1152	1.17361	W
							36	1297	640	2.02656	S
							37	1218	1096	1.11131	W
							38	1425	1277	1.1159	W
							39	2035	925	2.2	S
							40	576	166	3.46988	S
							41	1591	1020	1.5598	M
							42	968	717	1.35007	W
							43	1398	1065	1.31268	W
							44	1483	1201	1.2348	W
							45	1737	1103	1.5748	M
							46	1759	554	3.17509	S
							47	2016	1546	1.30401	W
							48	1676	1349	1.2424	W
							49	2613	884	2.95588	S
							50	2305	952	2.42122	S
							51	2237	1041	2.1489	S
							52	2419	1340	1.80522	S
							53	1587	1541	1.02985	W
							54	2040	1322	1.54312	M
										#DIV/0!

## Sheet: Graph
	eau	4d22	SA11	cristaux
forte	0.723404	0.851852	0.45098	0.444444
intermediaire	0.12766	0.0740741	0.196078	0.166667
faible	0.148936	0.0740741	0.352941	0.388889

## Sheet: boite à moustache
		H2O	4D22	SA11	crystals
	1	1.98013	1.85594	1.3796	2.5
	2	1.87373	1.53441	1.33294	1.42647
	3	2.26574	2.58077	1.08294	1.27454
	4	1.70506	2.46101	1.94578	1.27041
	5	1.91315	2.63324	1.6144	3.94609
	6	1.55567	1.42069	1.76939	4.27491
	7	1.22581	1.48049	1.95687	1.62529
	8	2.92857	2.46571	1.5816	1.55701
	9	3.13333	1.74927	2.93625	1.65079
	10	1.63115	2.06777	2.48179	2.50096
	11	1.83721	2.00441	2.13043	1.05851
	12	1.2	2.10476	1.20563	1.70747
	13	2.26744	2.31761	2.47856	1.4662
	14	1.22472	2.59877	1.66731	1.12657
	15	1.88496	1.66925	1.18823	1.25561
	16	4.39655	1.83594	1.52521	3.88235
	17	3.64286	1.90418	1.44734	2.37741
	18	2.59579	2.98844	1.11933	0.986047
	19	2.43364	2.2641	1.16632	2.1826
	20	1.20242	1.42135	1.36592	2.02493
	21	1.7056	2.06041	2.15666	1.40744
	22	1.52224	3.11243	1.12421	1.36066
	23	1.95766	1.66913	1.64207	1.07153
	24	1.70146	2.25862	1.21408	1.29029
	25	2.42137	2.01131	1.18204	1.56172
	26	2.86443	1.86311	2.05028	1.62439
	27	2.62225	2.42665	1.04249	1.22846
	28	1.35075		1.48705	1.96142
	29	1.93548		2.34008	4.58748
	30	1.432		1.48599	2.24147
	31	0.961276		1.67455	1.41153
	32	1.7691		1.45177	0.974249
	33	1.69343		1.01637	1.22085
	34	1.01752		1.34471	1.73018
	35	3.19854		1.99691	1.17361
	36	2.02089		1.23196	2.02656
	37	2.19263		2.17246	1.11131
	38	3.47326		1.0098	1.1159
	39	1.47337		1.19585	2.2
	40	2.40547		1.61038	3.46988
	41	1.56759		1.96758	1.5598
	42	1.51423		2.03075	1.35007
	43	1.7398		1.78077	1.31268
	44	1.67891		1.6408	1.2348
	45	2.06071		2.16441	1.5748
	46	2.08278		1.46604	3.17509
	47	1.71445		1.57009	1.30401
	48			1.40657	1.2424
	49			1.00254	2.95588
	50			1.65718	2.42122
	51			1.40785	2.1489
	52				1.80522
	53				1.02985
	54				1.54312
