# Supplementary material for: Bacillus thuringiensis toxins divert progenitor cells toward enteroendocrine fate by decreasing cell adhesion with intestinal stem cells in Drosophila
Source: eLife journal article supplement (doi:10.7554/elife.80179), 2023-02-06
Supplement: fig5-data1 [file Figure 5E (Pros counting esgReDDM Cad).xlsx]

## Sheet: stat RFP-Pros+
			Tukey-Kramer Test: Pairwise Comparisons for One-Way Layout Design
				eau	4d22
			Mean	8.88061	8.25701
			S.E.M.	0.385827	0.686008
			S.D.	3.06241	2.91049
			Variance	9.37833	8.47093
			Sum	559.478	148.626
			N	63	18
			Grand Mean	8.74203
			Total N	81
			Errors Estimates
			SS(E)	725.462
			Df(E)	79
			Var(E)	9.18306
			SE(E)	3.03036
			t-Table	Upper Right: tij (Test Statistics between i and j groups); Lower Left: P-Values (Studentized Range Distribution)
				eau		4d22
			eau			-0.769972	Not Significant (P>0.05)
			4d22	0.4436
			Tukey-Kramer Test: Pairwise Comparisons for One-Way Layout Design
				eau	dipel
			Mean	8.88061	8.32326
			S.E.M.	0.385827	0.512382
			S.D.	3.06241	3.28085
			Variance	9.37833	10.764
			Sum	559.478	341.254
			N	63	41
			Grand Mean	8.66088
			Total N	104
			Errors Estimates
			SS(E)	1012.01
			Df(E)	102
			Var(E)	9.92171
			SE(E)	3.14988
			t-Table	Upper Right: tij (Test Statistics between i and j groups); Lower Left: P-Values (Studentized Range Distribution)
				eau		dipel
			eau			-0.881809	Not Significant (P>0.05)
			dipel	0.38
				Tukey-Kramer Test: Pairwise Comparisons for One-Way Layout Design
					eau	cristaux
				Mean	8.88061	8.37276
				S.E.M.	0.385827	0.480927
				S.D.	3.06241	2.76271
				Variance	9.37833	7.63258
				Sum	559.478	276.301
				N	63	33
				Grand Mean	8.70603
				Total N	96
				Errors Estimates
				SS(E)	825.699
				Df(E)	94
				Var(E)	8.78403
				SE(E)	2.96379
				t-Table	Upper Right: tij (Test Statistics between i and j groups); Lower Left: P-Values (Studentized Range Distribution)
					eau		cristaux
				eau			-0.797405	Not Significant (P>0.05)
				cristaux	0.4272

## Sheet: stat RFP+Pros+
	Tukey-Kramer Test: Pairwise Comparisons for One-Way Layout Design
		eau	4d22
	Mean	0.509885	0.391978
	S.E.M.	0.153271	0.19451
	S.D.	1.22617	0.825236
	Variance	1.50349	0.681014
	Sum	32.6326	7.0556
	N	64	18
	Grand Mean	0.484003
	Total N	82
	Errors Estimates
	SS(E)	106.297
	Df(E)	80
	Var(E)	1.32871
	SE(E)	1.1527
	t-Table	Upper Right: tij (Test Statistics between i and j groups); Lower Left: P-Values (Studentized Range Distribution)
		eau		4d22
	eau			-0.383392	Not Significant (P>0.05)
	4d22	0.7024
	Tukey-Kramer Test: Pairwise Comparisons for One-Way Layout Design
		eau	dipel
	Mean	0.509885	1.85147
	S.E.M.	0.153271	0.426148
	S.D.	1.22617	2.72868
	Variance	1.50349	7.44568
	Sum	32.6326	75.9102
	N	64	41
	Grand Mean	1.03374
	Total N	105
	Errors Estimates
	SS(E)	392.547
	Df(E)	103
	Var(E)	3.81114
	SE(E)	1.95221
	t-Table	Upper Right: tij (Test Statistics between i and j groups); Lower Left: P-Values (Studentized Range Distribution)
		eau		dipel
	eau			3.4354	*** (P<=0.001)
	dipel	0.0008554
		Tukey-Kramer Test: Pairwise Comparisons for One-Way Layout Design
			eau	cristaux
		Mean	0.509885	1.50461
		S.E.M.	0.153271	0.383506
		S.D.	1.22617	2.20307
		Variance	1.50349	4.85354
		Sum	32.6326	49.6522
		N	64	33
		Grand Mean	0.848297
		Total N	97
		Errors Estimates
		SS(E)	250.033
		Df(E)	95
		Var(E)	2.63193
		SE(E)	1.62232
		t-Table	Upper Right: tij (Test Statistics between i and j groups); Lower Left: P-Values (Studentized Range Distribution)
			eau		cristaux
		eau			2.86107	** (P<=0.01)
		cristaux	0.005194

## Sheet: graphe
eau	8.88061	0.509885
4d22	8.25701	0.391978
dipel	8.32326	1.85147
cristaux	8.37276	1.50461

## Sheet: Graph Armel
H2O	rfp-pros+	rfp+pros+		4D22	rfp-pros+	rfp+pros+		SA11	rfp-pros+	rfp+pros+		Cristaux	rfp-pros+	rfp+pros+
	10.6033	1.92788			5.18343	0			12.9379	0			10.9861	0.183101
	13.6151	0			6.33153	0			10.3762	1.59633			11.0933	0.950858
	14.7728	0			12.3028	0			14.9732	1.06951			6.45764	0.176117
	12.3123	0			6.08943	1.82683			16.3429	0			8.85256	0
	14.6417	0			14.7484	0.614518			8.43486	0			9.9677	0
	6.27929	0			8.94903	0			10.1499	0			5.57345	0
	12.2771	0			7.17384	0			3.05469	0			5.4284	0
	8.53646	0			7.01656	0			4.58057	0			7.95178	0.662649
	5.44772	0			5.63821	0.805458			9.34016	0			10.444	0
	5.54373	0.923954			3.64723	0			11.4164	0			4.66257	0.582822
	8.3104	0			7.05971	0			7.67288	0			4.10674	0
	9.73379	0.648919			8.10682	0.736984			1.14247	0			6.84945	1.14157
	10.2989	0.643684			8.91364	0			5.79278	0			11.5919	1.22019
	9.57095	0			12.2873	3.07181			12.1544	5.00474			11.0014	0.611191
	6.7489	0			12.033	0			5.28162	0			5.75461	0
	6.48038	0			7.2198	0			3.32292	0			8.07946	3.67248
	5.77953	0			9.12665	0			9.54673	8.27383			1.84243	1.22829
	8.25153	5.07787			6.79877	0			9.40909	0			7.03167	2.92986
	5.51089	0			8.25701	0.391978			7.81888	1.2029			7.22754	4.81836
	2.53451	0							4.30761	2.46149			10.7871	0.634534
	7.19167	0							5.80525	1.16105			11.5837	2.43868
	6.26554	2.27838							6.57496	7.77041			6.65425	3.32713
	9.03487	0							6.80906	4.76634			5.288	0
	5.88626	0							6.37028	0.637028			9.91696	0
	10.2943	6.61778							10.4532	9.14656			4.78398	7.77397
	10.8686	0							8.27307	5.09112			13.1757	0
	5.84292	0							4.75057	2.37528			11.1801	0
	6.66167	0							12.5723	7.5434			12.3667	0
	8.90011	0							9.10225	3.2508			10.8652	6.03625
	5.6597	0							7.75361	1.19286			9.24394	0
	4.01559	0							10.5709	0			8.47568	0
	6.653	0							8.54416	1.70883			9.05503	5.09345
	4.15622	0							12.7194	5.72372			8.02186	6.17067
	13.5042	0							7.49172	0			8.37276	1.50461
	4.52703	0							6.84413	0
	6.25786	0							6.93161	0.577634
	4.58962	0							6.84758	0
	7.66142	0							13.4256	0
	12.9552	2.59105							6.8054	0
	11.9093	1.88041							7.85723	0
	7.11618	0							6.69543	5.35634
	7.0431	0							8.32326	1.85147
	9.8085	0
	6.10607	0
	8.68338	0
	13.0635	0
	13.0495	0
	12.7285	0.606119
	12.7718	0.636386
	7.94338	0
	6.5329	0
	8.00466	0
	11.2843	0
	7.67013	0
	11.4745	1.91753
	8.21944	0
	10.5798	0				n	rfp-pros+	Ecart type	SEM	rfp+pros+	Ecart type	SEM
	11.7321	2.48936			eau	63	8.88061	3.06241	0.385827	0.517978	1.23429	0.155506
	11.6346	2.76049			4d22	18	8.25701	2.91049	0.686008	0.391978	0.825236	0.19451
	6.86358	0			dipel	41	8.32326	3.28085	0.512382	1.85147	2.72868	0.426148
	13.8791	0			cristaux	33	8.37276	2.76271	0.480927	1.50461	2.20307	0.383506
	10.4582	1.63283
	12.7464	0
	8.88061	0.517978
