# Supplementary material for: Bacillus thuringiensis toxins divert progenitor cells toward enteroendocrine fate by decreasing cell adhesion with intestinal stem cells in Drosophila
Source: eLife journal article supplement (doi:10.7554/elife.80179), 2023-02-06
Supplement: fig5-data1 [file Figure 5F (EC coutning esgReDDM Cad).xlsx]

## Sheet: 3j eau 
intestin	surface	rfp-dapi+		rfp+dapi+		photos								89.4034		0.246895
1	26238.1	143	109.002	0	0	un381								60.9602		0
2	18001.3	125	138.879	2	2.22206	un391								57.4461		0.051834
3	18369.9	124	135.003	0	0	un400								73.0931		0
4	24987	130	104.054	0	0	un411								70.2257		0.0746823
5	27330.5	102	74.6419	0	0	un422
6	34465.4	71	41.2008	0	0	un445
7	34741.4	111	63.9006	2	0	un475
8	32037.1	112	69.9189	0	0	un484
9	29398.6	100	68.0305	0	0	un493
			89.4034		0.246895
intestin	surface	rfp-dapi+		rfp+dapi+
1	28643.2	128	89.3753	0		un623
2	35504.6	130	73.23	0	0	un633
3	32629.6	99	60.6812	0	0	un640
4	33702.1	107	63.4976	0	0	un649
5	32966.7	71	43.0737	0	0	un656
6	35655.9	84	47.117	0	0	un663
7	29444.4	84	57.0567	19	0	un673
8	32059.4	86	53.6505	13		un683
			60.9602		0
intestin	surface	rfp-dapi+		rfp+dapi+
1	34466.4	77	44.6812	0	0	un243
2	34600.2	83	47.9766	0	0	un250
3	31279.2	56	35.8066	0	0	un266
4	24010.1	100	83.2983	0	0	un273
5	25810.7	75	58.1155	0	0	un280
6	27754.8	82	59.0888	0	0	un287
7	26146	86	65.7844	0	0	un294
8	17598.1	43	48.869	0	0	un301
9	35077	89	50.7454	1	0.570173	un308
10	31301.8	112	71.5613	0	0	un315
11	28493.4	94	65.9801	0	0	un322
			57.4461		0.051834
intestin	surface	rfp-dapi+		rfp+dapi+
1	27657.1	135	97.6241	0	0	un555
2	30969	101	65.2266	0	0	un562
3	35599.2	114	64.0464	0	0	un569
4	32077.4	102	63.5961	0	0	un576
5	31833.9	134	84.187	0	0	un583
6	29878.4	117	78.3175	0	0	un597
7	32052.5	94	58.6538	0	0	un604
			73.0931		0

## Sheet:  eau t 
		rfp-							rfp+
		74.6419							0
		41.2008							0
		63.9006							0
		69.9189							0
		68.0305							0
		89.3753							0
		73.23							0
		60.6812							0
		63.4976							0
		43.0737							0
		47.117							0
		57.0567							0
		53.6505							0
		44.6812							0
		47.9766							0
		35.8066							0
		83.2983							0
		58.1155							0
		59.0888							0
		65.7844							0
		48.869							0
		50.7454							0.570173
		71.5613							0
		65.9801							0
		97.6241							0
		65.2266							0
		64.0464							0
		63.5961							0
		84.187							0
		78.3175							0
		58.6538							0
		62.8688							0.0183927

## Sheet: 3j 4d22
intestin	surface	photos	rfp-dapi+		rfp+dapi+
1	35566.7	un80	82	46.1105	0	0
2	33280	un92	102	61.2981	3	1.80288
3	32345.8	un103	151	93.3662	2	1.23664
4	32696.8	un114	56	34.2541	17	10.3986
5	35579.2	un125	34	19.1123	26	14.6153
6	33098	un137	93	56.1968	16	9.66827
7	30579.3	un144	108	70.6361	4	2.61615
8	32985.7	un151	97	58.8133	4	2.42529
9	31977.2	un158	118	73.8027	7	4.37812
10	22739.2	un165	84	73.8812	6	5.27723
11	32587.4	un172	106	65.0558	2	1.22747
12	29831.3	un179	74	49.6124	3	2.01131
13	25726.9	un186	125	97.1746	2	1.55479
14	31067.4	un202	119	76.6075	2	1.28752
15	32887.6	un211	90	54.7319	4	2.43253
16	34801.9	un249	115	66.0883	9	5.17212
17	32522.4	un256	75	46.122	0	0
18	30536.7	un263	64	41.9168	1	0.65495
19	24226	un218	124	102.369	13	10.7323
				62.4816		4.0785

## Sheet: 3j dipel 
intestin	surface	photos	rfp-dapi+		rfp+dapi+				cad dipel
1	30549.2	un138	98	64.1587	48	31.4247							71.4989		22
2	26540.3	un230	103	77.6178	45	33.9107							55.4562		19.4187
3	17996.5	un252	90	100.019	4	4.4453
4	20696	un263	95	91.8053	5	4.83186							63.4775		20.7093
5	26677.1	un274	92	68.9731	20	14.9941
6	32552.3	un291	43	26.4191	69	42.3934
				71.4989		22
intestin	surface	photos	rfp-dapi+		rfp+dapi+
1	33247.2	un40	103	61.9601	11	6.6171
2	34069.6	un50	63	36.9831	4	2.34813
3	33434	un61	131	78.3635	34	20.3386
4	35368.9	un71	84	47.4994	64	36.19
5	35464.8	un82	62	34.9642	58	32.7085
6	30617.7	un95	129	84.2651	10	6.53218
7	31431.7	un102	117	74.4473	16	10.1808
8	31934.6	un109	128	80.1638	15	9.3942
9	31558.3	un121	80	50.6999	14	8.87247
10	35948.8	un148	81	45.0641	27	15.0214
11	29933.5	un159	68	45.434	54	36.08
12	28886.3	un201	98	67.8522	61	42.2345
13	30812	un212	65	42.1914	7	4.54369
14	33393.3	un222	115	68.876	14	8.38491
15	32207.5	un232	89	55.2667	27	16.7663
16	33236	un242	87	52.3529	23	13.8404
17	31035.6	un252	37	23.8436	73	47.0428
18	29592.8	un262	71	47.9846	48	32.4403
				55.4562		19.4187
intestin	surface	photos	rfp-dapi+		rfp+dapi+
1	35544.2	apo3	63	35.4488	23	12.9416
intestin	surface	photos	rfp-dapi+		rfp+dapi+
1	31194.5	un71	60	38.4684	55	35.2627
2	35641.4	un82	22	12.3452	49	27.4961
3	31932.1	un98	87	54.4906	21	13.1529
4	34150.8	un107	60	35.1383	41	24.0111
5	30206.7	un116	62	41.0505	59	39.0642
6	35685.1	un126	79	44.2762	23	12.8905
7	33390.7	un135	30	17.9691	48	28.7506
8	35025.9	un158	74	42.2544	2	1.14201
9	35498.7	un172	76	42.8185	8	4.50721
10	36156.4	un193	41	22.6793	18	9.95674
				35.149		19.6234
	34285	un198	105	61.2513	24	14.0003
	34672	un140	70	40.3784	35	20.1892
	33258	un272	27	16.2367	83	49.9128
	36270	un57	25	13.7855	78	43.0108
				#DIV/0!		#DIV/0!
				#DIV/0!		#DIV/0!
				#DIV/0!		#DIV/0!
				#DIV/0!		#DIV/0!
				#DIV/0!		#DIV/0!
						#DIV/0!

## Sheet: dipel t 
			rfp-									rfp+
		64.1587		64.1587							31.4247		31.4247
		77.6178		77.6178							33.9107		33.9107
		100.019		100.019							4.4453		4.4453
		91.8053		91.8053							4.83186		4.83186
		68.9731		68.9731							14.9941		14.9941
		26.4191		26.4191							42.3934		42.3934
		61.9601		61.9601							6.6171		6.6171
		36.9831		36.9831							2.34813		2.34813
		78.3635		78.3635							20.3386		20.3386
		47.4994		47.4994							36.19		36.19
		34.9642		34.9642							32.7085		32.7085
		84.2651		84.2651							6.53218		6.53218
		74.4473		74.4473							10.1808		10.1808
		80.1638		80.1638							9.3942		9.3942
		50.6999		50.6999							8.87247		8.87247
		45.0641		45.0641							15.0214		15.0214
		45.434		45.434							36.08		36.08
		67.8522		67.8522							42.2345		42.2345
		42.1914		42.1914							4.54369		4.54369
		68.876		68.876							8.38491		8.38491
		55.2667		55.2667							16.7663		16.7663
		52.3529		52.3529							13.8404		13.8404
		23.8436		23.8436							47.0428		47.0428
		47.9846		47.9846							32.4403		32.4403
		38.4684		38.4684							35.2627		35.2627
		12.3452		12.3452							27.4961		27.4961
		54.4906		54.4906							13.1529		13.1529
		35.1383		35.1383							24.0111		24.0111
		41.0505		41.0505							39.0642		39.0642
		44.2762		44.2762							12.8905		12.8905
		17.9691		17.9691							28.7506		28.7506
		42.2544		42.2544							1.14201		1.14201
		42.8185		42.8185							4.50721		4.50721
		22.6793		22.6793							9.95674		9.95674
		61.2513		52.3146							14.0003		19.9344
		40.3784									20.1892
		16.2367									49.9128
		13.7855									43.0108
		50.2723									21.1811

## Sheet: 3j cristaux 
			rfp-		rp+
1	33994.4	un181	30	17.6499	38	22.3566		2503
2	31279.4	un209	96	61.3823	21	13.4274							38.2472		18.6716
3	36221.1	un216	72	39.7559	7	3.86515							38.9884		14.2771
4	36019.6	un223	89	49.4176	22	12.2156							42.2995		11.933
5	36245.6	un259	64	35.3146	70	38.6254							52.3158		12.1155
6	34242.9	un273	47	27.451	51	29.7872							42.9627		14.2493
7	36453.7	un280	67	36.759	19	10.4242
				38.2472		18.6716
								80421
1	35286.7	un214	79	44.776	15	8.50178
2	34239.2	un223	50	29.2063	35	20.4444
3	33437.3	un245	98	58.6173	0	0
4	28947	un274	74	51.1278	5	3.45458
5	33073.1	un283	66	39.9116	32	19.3511
6	27147.7	un292	41	30.2051	44	32.4152
7	35067.1	un328	72	41.0641	5	2.85168
8	35297	un344	30	16.9986	48	27.1978
				38.9884		14.2771
1	31730.7	un408	66	41.6	26	16.3879
2	32093.8	un419	69	42.999	12	7.47809
				42.2995		11.933
1	31286.3	un213	131	83.7426	0	0
2	29090	un220	104	71.5024	0	0
3	36216	un230	103	56.8809	8	4.41793
4	34661.3	un237	120	69.2414	0	0
5	32300.5	un251	67	41.4855	7	4.3343
6	25806.5	un260	79	61.2249	11	8.52498
7	31476.4	un269	79	50.1963	12	7.62476
8	29674.1	un281	78	52.571	0	0
9	23246.7	un290	81	69.6872	10	8.60336
10	31595.1	un297	64	40.5126	45	28.4854
11	31956.9	un306	75	46.9383	46	28.7888
12	35174.6	un315	45	25.5866	51	28.9982
13	33983.1	un324	66	38.8428	41	24.1296
14	26700.8	un342	72	53.9309	8	5.99232
15	31982.3	un361	82	51.2783	30	18.7604
16	34142.3	un370	40	23.4313	43	25.1887
				52.3158		12.1155
	37414	un167	43	22.986	60	32.0736
	37869	un287	31	16.3722	91	48.0604
	37765	un244	37	19.5949	63	33.3642
	37372	un223	87	46.5589	30	16.0548
	33276	un209	69	41.4713	64	38.4662
	30725	un202	97	63.1408	47	30.594

## Sheet: 3j cristaux t 
			rfp-							rfp+
			61.3823							13.4274
			39.7559							3.86515
			49.4176							12.2156
			35.3146							38.6254
			27.451							29.7872
			36.759							10.4242
			44.776							8.50178
			29.2063							20.4444
			51.1278							3.45458
			39.9116							19.3511
			30.2051							32.4152
			41.0641							2.85168
			16.9986							27.1978
			41.6							16.3879
			42.999							7.47809
			56.8809							4.41793
			41.4855							4.3343
			61.2249							8.52498
			50.1963							7.62476
			69.6872							8.60336
			40.5126							28.4854
			46.9383							28.7888
			25.5866							28.9982
			38.8428							24.1296
			53.9309							5.99232
			51.2783							18.7604
			23.4313							25.1887
			22.986							32.0736
			16.3722							48.0604
			19.5949							33.3642
			46.5589							16.0548
			41.4713							38.4662
			63.1408							30.594
			41.1542							19.3603

## Sheet: Stat EC RFP-
eau	4d22
74.6419	46.1105
41.2008	61.2981			Tukey-Kramer Test: Pairwise Comparisons for One-Way Layout Design
63.9006	93.3662
69.9189	34.2541				eau	4d22
68.0305	19.1123			Mean	62.8688	60.2656
89.3753	56.1968			S.E.M.	2.61541	4.61921
73.23	70.6361			S.D.	14.562	19.5976
60.6812	58.8133			Variance	212.052	384.067
63.4976	73.8027			Sum	1948.93	1084.78
43.0737	73.8812			N	31	18
47.117	65.0558
57.0567	49.6124			Grand Mean	61.9125
53.6505	97.1746			Total N	49
44.6812	76.6075
47.9766	54.7319			Errors Estimates
35.8066	66.0883			SS(E)	12890.7
83.2983	46.122			Df(E)	47
58.1155	41.9168			Var(E)	274.27
59.0888	102.369			SE(E)	16.5611
65.7844
48.869				t-Table	Upper Right: tij (Test Statistics between i and j groups); Lower Left: P-Values (Studentized Range Distribution)
50.7454
71.5613					eau		4d22
65.9801				eau			-0.530447	Not Significant (P>0.05)
97.6241				4d22	0.5983
65.2266
64.0464
63.5961
84.187
78.3175
58.6538
eau	dipel				Tukey-Kramer Test: Pairwise Comparisons for One-Way Layout Design
74.6419	64.1587
41.2008	77.6178					eau	dipel
63.9006	100.019				Mean	62.8688	52.3146
69.9189	91.8053				S.E.M.	2.61541	3.68907
68.0305	68.9731				S.D.	14.562	21.5108
89.3753	26.4191				Variance	212.052	462.713
73.23	61.9601				Sum	1948.93	1778.7
60.6812	36.9831				N	31	34
63.4976	78.3635
43.0737	47.4994				Grand Mean	57.3481
47.117	34.9642				Total N	65
57.0567	84.2651
53.6505	74.4473				Errors Estimates
44.6812	80.1638				SS(E)	21631.1
47.9766	50.6999				Df(E)	63
35.8066	45.0641				Var(E)	343.351
83.2983	45.434				SE(E)	18.5297
58.1155	67.8522
59.0888	42.1914				t-Table	Upper Right: tij (Test Statistics between i and j groups); Lower Left: P-Values (Studentized Range Distribution)
65.7844	68.876
48.869	55.2667					eau		dipel
50.7454	52.3529				eau			-2.29362	* (P<=0.05)
71.5613	23.8436				dipel	0.02516
65.9801	47.9846
97.6241	38.4684
65.2266	12.3452
64.0464	54.4906
63.5961	35.1383			Test H2O vs Dipel	0.0041218
84.187	41.0505
78.3175	44.2762
58.6538	17.9691
	42.2544
	42.8185
	22.6793
	61.2513
	40.3784
	16.2367
	13.7855
eau	cristaux			Tukey-Kramer Test: Pairwise Comparisons for One-Way Layout Design
74.6419	61.3823
41.2008	39.7559				eau	cristaux
63.9006	49.4176			Mean	62.8688	41.1542
69.9189	35.3146			S.E.M.	2.61541	2.87865
68.0305	27.451			S.D.	14.562	16.5366
89.3753	36.759			Variance	212.052	273.459
73.23	44.776			Sum	1948.93	1477.34
60.6812	29.2063			N	31	33
63.4976	51.1278
43.0737	39.9116			Grand Mean	53.5354
47.117	30.2051			Total N	64
57.0567	41.0641
53.6505	16.9986			Errors Estimates
44.6812	41.6			SS(E)	15112.3
47.9766	42.999			Df(E)	62
35.8066	56.8809			Var(E)	243.746
83.2983	41.4855			SE(E)	15.6124
58.1155	61.2249
59.0888	50.1963			t-Table	Upper Right: tij (Test Statistics between i and j groups); Lower Left: P-Values (Studentized Range Distribution)
65.7844	69.6872
48.869	40.5126				eau		crisaux
50.7454	46.9383			eau			-4.63536	*** (P<=0.001)
71.5613	25.5866			crisaux	2.021e-05
65.9801	38.8428
97.6241	53.9309
65.2266	51.2783
64.0464	23.4313
63.5961	22.986
84.187	16.3722
78.3175	19.5949
58.6538	46.5589
	41.4713
	63.1408
	41.1542

## Sheet: stat EC RFP+
eau	4d22
0	0
0	1.80288
0	1.23664				Tukey-Kramer Test: Pairwise Comparisons for One-Way Layout Design
0	10.3986
0	14.6153					eau	4d22
0	9.66827				Mean	0.0183927	2.59624
0	2.61615				S.E.M.	0.0183927	1.03719
0	2.42529				S.D.	0.102406	4.40042
0	4.37812				Variance	0.010487	19.3637
0	5.27723				Sum	0.570173	46.7322
0	1.22747				N	31	18
0	2.01131
0	1.55479				Grand Mean	0.965355
0	1.28752				Total N	49
0	2.43253
0	5.17212				Errors Estimates
0	0				SS(E)	329.497
0	0.65495				Df(E)	47
0	10.7323				Var(E)	7.01058
0					SE(E)	2.64775
0
0.570173					t-Table	Upper Right: tij (Test Statistics between i and j groups); Lower Left: P-Values (Studentized Range Distribution)
0
0						eau		4d22
0					eau			3.28548	** (P<=0.01)
0					4d22	0.00193
0
0
0
0
0
eau	dipel			Tukey-Kramer Test: Pairwise Comparisons for One-Way Layout Design
0	31.4247
0	33.9107				eau	dipel
0	4.4453			Mean	0.0183927	19.9344
0	4.83186			S.E.M.	0.0183927	2.38387
0	14.9941			S.D.	0.102406	13.9002
0	42.3934			Variance	0.010487	193.217
0	6.6171			Sum	0.570173	677.77
0	2.34813			N	31	34
0	20.3386
0	36.19			Grand Mean	10.436
0	32.7085			Total N	65
0	6.53218
0	10.1808			Errors Estimates
0	9.3942			SS(E)	6376.47
0	8.87247			Df(E)	63
0	15.0214			Var(E)	101.214
0	36.08			SE(E)	10.0605
0	42.2345
0	4.54369			t-Table	Upper Right: tij (Test Statistics between i and j groups); Lower Left: P-Values (Studentized Range Distribution)
0	8.38491
0	16.7663				eau		dipel
0.570173	13.8404			eau			7.97162	*** (P<=0.001)
0	47.0428			dipel	1.396e-06
0	32.4403
0	35.2627
0	27.4961
0	13.1529
0	24.0111
0	39.0642
0	12.8905
0	28.7506
	1.14201
	4.50721
	9.95674
	14.0003
	20.1892
	49.9128
	43.0108
eau	cristaux			Tukey-Kramer Test: Pairwise Comparisons for One-Way Layout Design
0	13.4274
0	3.86515				eau	cristaux
0	12.2156			Mean	0.0183927	19.3603
0	38.6254			S.E.M.	0.0183927	2.15742
0	29.7872			S.D.	0.102406	12.3934
0	10.4242			Variance	0.010487	153.597
0	8.50178			Sum	0.570173	421.58
0	20.4444			N	31	33
0	3.45458
0	19.3511			Grand Mean	6.5961
0	32.4152			Total N	64
0	2.85168
0	27.1978			Errors Estimates
0	16.3879			SS(E)	4915.42
0	7.47809			Df(E)	62
0	4.41793			Var(E)	79.281
0	4.3343			SE(E)	8.90399
0	8.52498
0	7.62476			t-Table	Upper Right: tij (Test Statistics between i and j groups); Lower Left: P-Values (Studentized Range Distribution)
0	8.60336
0	28.4854				eau		cristaux
0.570173	28.7888			eau			5.72801	*** (P<=0.001)
0	28.9982			cristaux	1.711e-06
0	24.1296
0	5.99232
0	18.7604
0	25.1887
0	32.0736
0	48.0604
0	33.3642
0	16.0548
	38.4662
	30.594
	19.3603

## Sheet: graphe
	DAPI+ RFP-	DAPI+ RFP+
eau	62.8	0.01
4d22	62.4816	4.0785
dipel	50.2723	21.1811
cristaux	41.1542	19.3603
sem
eau	2.61541	0.0183927
4d22	4.61921	1.03719
dipel	3.68907	2.38387
cristaux	2.87865	2.15742

[truncated: 1 more sheets: %]
