# Supplementary material for: Bacillus thuringiensis toxins divert progenitor cells toward enteroendocrine fate by decreasing cell adhesion with intestinal stem cells in Drosophila
Source: eLife journal article supplement (doi:10.7554/elife.80179), 2023-02-06
Supplement: fig5-data1 [file Figure 5G.xlsx]

## Sheet: eau 
intestin	surface	forte	faible	Interme			23072021		n	Junction	outer membrane	Ratio						%
1	33813.5	3	2	0	un455				1	1630	506	3.22134	S		weak<1,4		4	0.0909091
2	21076.2	7	0	0	un477				2	4095	597	6.8593	S		1,4<mild<1,6		7	0.159091
3	20918.4	8	3	0	un487				3	950	511	1.8591	S		1,6<strong		33	0.75
4	21330.2	13	0	0	un496				4	988	401	2.46384	S					1
5	21723.4	12	4	0	un504				5	1372	581	2.36145	S
6	21540.8	2	1	0	un514				6	1735	690	2.51449	S
7	22063.6	6	2	0	un525				7	1287	512	2.51367	S
8	25343.9	4	2	0	un533				8	1349	574	2.35017	S
		55	14	0		69			9	2151	648	3.31944	S
		0.797	0.202	0					10	742	482	1.53942	M
									11	1239	505	2.45347	S
1	22352.1	4	4	0	un840		150721		12	1770	227	7.79736	S
2	27834.2	4	1	0	un849				13	1991	911	2.18551	S
3	25331.6	4	1	0	un867				14	523	336	1.55655	M
4	19236.5	6	4	0	un894				15	2577	331	7.7855	S
5	22727.5	3	2	0	un903				16	1738	736	2.36141	S
6	31159.1	5	0	0	un912				17	829	587	1.41227	M
7	27753.2	4	1	0	un964				18	2013	335	6.00896	S
8	22410.6	5	2	0	un973				19	1592	436	3.65138	S
9	25781.3	2	2	0	un1007				20	1371	426	3.21831	S
		37	17	0		54			21	1354	416	3.25481	S
									22	1733	392	4.42092	S
									23	2925	303	9.65347	S
									24	1633	702	2.32621	S
									25	1719	828	2.07609	S
									26	1704	1099	1.5505	M
									27	814	892	0.912556	W
									28	1325	832	1.59255	M
									29	1407	941	1.49522	M
									30	1758	732	2.40164	S
									31	955	531	1.79849	S
									32	1979	909	2.17712	S
									33	402	539	0.745826	W
									34	1423	570	2.49649	S
									35	1942	326	5.95706	S
									36	1995	742	2.68868	S
									37	1289	879	1.46644	M
									38	2820	820	3.43902	S
									39	934	922	1.01302	W
									40	1360	570	2.38596	S
									41	1926	973	1.97945	S
									42	1658	451	3.67627	S
									43	438	563	0.777975	W
									44	1022	405	2.52346	S
									45			#DIV/0!
									46			#DIV/0!
									47			#DIV/0!
												#DIV/0!

## Sheet: 4d22
intestin	surface	forte	faible	Intermediaire				n	Junction	outer membrane	Ratio						%
1		12	2	0				1	1542	582	2.64948	S		weak<1,4		1	0.0185185
2	28552.1	10	4	0	un562			2	1359	452	3.00664	S		1,4<mild<1,6		3	0.0555556
3	28564.1	10	3	0	un578			3	2634	907	2.90408	S		1,6<strong		50	0.925926
4	23645.1	7	3	0	un595			4	1202	409	2.93888	S					1
5	29784.4	3	1	0	un613			5	893	450	1.98444	S
6	18686.3	4	1	0	un630			6	1411	430	3.2814	S
7	21883.3	5	1	0	un638			7	913	641	1.42434	M
8	20076.9	3	1	0	un655			8	1236	457	2.7046	S
9	27032	6	2	0	un681			9	1882	496	3.79435	S
10	28654.5	10	1	0	un698			10	1733	507	3.41815	S
11	33301.7	5	1	0	un714			11	2491	828	3.00845	S
12	32204.5	6	1	0	un722			12	1410	477	2.95597	S
13	31001.3	4	1	0	un739			13	1959	490	3.99796	S
		85	22					14	1113	670	1.66119	S
		0.794	0.205					15	1412	675	2.09185	S
								16	1576	440	3.58182	S
								17	1210	414	2.92271	S
1	18404.1	8	1	0	un643			18	1242	566	2.19435	S
2	30591.4	3	1	0	un706			19	848	334	2.53892	S
3	20644	4	1	0	un767			20	1691	638	2.65047	S
4	18762.1	5	1	0	un776			21	1038	476	2.18067	S
5	26598	5	1	0	un803			22	469	290	1.61724	S
		25	5					23	805	533	1.51032	M
								24	1076	581	1.85198	S
								25	1392	470	2.9617	S
								26	1929	317	6.08517	S
								27	1413	528	2.67614	S
								28	1653	421	3.92637	S
								29	1312	429	3.05828	S
								30	1596	456	3.5	S
								31	1574	514	3.06226	S
								32	671	547	1.22669	W
								33	1114	447	2.49217	S
								34	2529	861	2.93728	S
								35	1381	626	2.20607	S
								36	1245	575	2.16522	S
								37	824	512	1.60938	S
								38	1408	325	4.33231	S
								39	2615	885	2.9548	S
								40	2817	592	4.75845	S
								41	2280	1125	2.02667	S
								42	1063	712	1.49298	M
								43	1563	429	3.64336	S
								44	2011	680	2.95735	S
								45	1246	308	4.04545	S
								46	768	257	2.98833	S
								47	1505	565	2.66372	S
								48	813	417	1.94964	S
								49	1535	442	3.47285	S
								50	1012	417	2.42686	S
								51	1409	479	2.94154	S
								52	1438	374	3.84492	S
								53	1001	585	1.71111	S
								54	824	420	1.9619	S
								55			#DIV/0!

## Sheet: delfin
intestin	surface	fort	faible	Inter			220721		n	Junction	outer membrane	Ratio
1	34114.4	13	7	0	un207				1	1587	611	2.59738	S		weak<1,4		7	0.145833
2	31521.3	8	3	0	un215				2	2810	644	4.36335	S		1,4<mild<1,6		1	0.0208333
3	30038	6	1	0	un244				3	2323	373	6.22788	S		1,6<strong		40	0.833333
4	27631.9	7	2	0	un282				4	1536	510	3.01176	S					1
5	33054.8	3	2	0	un300				5	3088	716	4.31285	S
6	24766.4	5	4	0	un318				6	1994	559	3.56708	S
7	28760.5	4	5	0	un327				7	1466	653	2.24502	S
8	28780.6	9	4	0	un346				8	1279	1262	1.01347	W
9	31057.5	5	3	0	un355				9	2391	518	4.61583	S
10	27270.8	5	2	0	un364				10	1576	567	2.77954	S
11	19431.7	3	1	0	un391				11	2503	764	3.27618	S
12	24484.3	3	2	0	un400				12	1381	500	2.762	S
		71	36						13	478	564	0.847518	W
									14	1848	840	2.2	S
									15	885	230	3.84783	S
1	28728.9	2	1	0	un324				16	1269	693	1.83117	S
2	26278.1	2	2	0	un422				17	1045	628	1.66401	S
3	21533.2	5	2	0	un413				18	1891	904	2.09181	S
4	23321.6	2	1	0	un370				19	1683	474	3.55063	S
5	20645.3	6	2	0	un359				20	1591	619	2.57027	S
									21	1906	925	2.06054	S
									22	1735	790	2.1962	S
									23	1554	597	2.60302	S
									24	1338	688	1.94477	S
									25	1217	937	1.29883	W
									26	993	1128	0.880319	W
									27	1644	672	2.44643	S
									28	600	485	1.23711	W
									29	1888	711	2.65541	S
									30	2138	723	2.95712	S
									31	2110	932	2.26395	S
									32	1543	672	2.29613	S
									33	2000	1581	1.26502	W
									34	2698	912	2.95833	S
									35	2347	1034	2.26983	S
									36	1335	761	1.75427	S
									37	2432	1057	2.30085	S
									38	2117	1167	1.81405	S
									39	2892	1445	2.00138	S
									40	2232	939	2.377	S
									41	3589	863	4.15875	S
									42	4095	1018	4.02259	S
									43	2214	828	2.67391	S
									44	2548	932	2.73391	S
									45	1736	1448	1.1989	W
									46	3209	1270	2.52677	S
									47	4095	1022	4.00685	S
									48	2283	1509	1.51292	M

## Sheet: cristaux
	n	Junction	outer membrane	Ratio
	1	1154	408	2.82843	S		weak<1,4		5	0.0892857
	2	896	441	2.03175	S		1,4<mild<1,6		2	0.0357143
	3	1022	535	1.91028	S		1,6<strong		49	0.875
	4	1410	654	2.15596	S					1
	5	1216	477	2.54927	S
	6	1568	617	2.54133	S
	7	1865	984	1.89533	S
	8	762	596	1.27852	W
	9	2338	691	3.3835	S
	10	1788	538	3.32342	S
	11	2599	934	2.78266	S
	12	1275	1139	1.1194	W
	13	1862	798	2.33333	S
	14	2380	710	3.35211	S
	15	2657	1035	2.56715	S
	16	1523	808	1.8849	S
	17	1500	607	2.47117	S
	18	1698	612	2.77451	S
	19	1016	639	1.58998	M
	20	2105	1074	1.95996	S
	21	1693	444	3.81306	S
	22	2131	1105	1.92851	S
	23	1345	1239	1.08555	W
	24	911	441	2.06576	S
	25	1372	526	2.60837	S
	26	1560	541	2.88355	S
	27	1448	655	2.21069	S
	28	1970	671	2.93592	S
	29	1351	849	1.59128	M
	30	1722	602	2.86047	S
	31	954	435	2.1931	S
	32	1557	390	3.99231	S
	33	2117	641	3.30265	S
	34	1938	975	1.98769	S
	35	2219	845	2.62604	S
	36	2334	554	4.213	S
	37	2009	770	2.60909	S
	38	1413	682	2.07185	S
	39	1872	1078	1.73655	S
	40	1762	1031	1.70902	S
	41	1733	810	2.13951	S
	42	2051	675	3.03852	S
	43	1715	918	1.86819	S
	44	2921	1009	2.89495	S
	45	1834	961	1.90843	S
	46	1520	897	1.69454	S
	47	1092	594	1.83838	S
	48	2099	811	2.58816	S
	49	1123	996	1.12751	W
	50	2761	955	2.8911	S
	51	2814	476	5.91176	S
	52	2947	1107	2.66215	S
	53	2119	700	3.02714	S
	54	805	1322	0.608926	W
	55	949	542	1.75092	S
	56	707	387	1.82687	S

## Sheet: graphe
	Strong	mild	Weak
Ctrl	0.75	0.159091	0.0909091	1
Bt∆Cry	0.925926	0.0555556	0.0185185	1
BtKSA11	0.833333	0.0208333	0.145833	1
Crystal	0.875	0.0357143	0.0892857	1
