# Supplementary material for: Bacillus thuringiensis toxins divert progenitor cells toward enteroendocrine fate by decreasing cell adhesion with intestinal stem cells in Drosophila
Source: eLife journal article supplement (doi:10.7554/elife.80179), 2023-02-06
Supplement: fig5-figsupp2-data1 [file fig5 fig sup 2I.xlsx]

## Sheet: con 3j eau 
intestin	surface	rfp-pros+		rfp+pros+				connectin eau 25032021				surface 20000µm²
1	34752.1	7	4.02854	0	0	un80
2	33211.4	9	5.41982	0	0	un87
3	34231.3	11	6.42687	0	0	un94
4	30976.6	14	9.03907	0	0	un101
5	33486.8	17	10.1532	0	0	un147
6	31111	20	12.8572	1	0.642859	un112
7	35347.5	17	9.61877	0	0	un119
8	33236.4	19	11.4332	0	0	un126
9	29960.9	10	6.67537	0	0	un133
10	32123.2	21	13.0747	0	0	un140
intestin	surface	rfp-pros+		rfp+pros+				connectin 3j eau 16032021
1	29820	27	18.1086	0	0	un670
2	31911.2	26	16.2952	0	0	un677
3	34122.8	7	4.10283	0	0	un684
4	34316.1	11	6.41099	0	0	un691
5	34970.2	10	5.71916	0	0	un698
6	33796.2	20	11.8357	0	0	un705
7	32517.3	13	7.99575	0	0	un712
8	34808.2	11	6.32036	0	0	un719
9	31941	17	10.6446	2	1.25231	un726
10	30076.9	18	11.9693	0	0	un739
11	31629.6	9	5.69088	0	0	un746
12	33962.2	9	5.30001	0	0	un760
13	24357.9	19	15.6007	0	0	un774
14	27010.1	19	14.0688	0	0	un781
15	29541.3	20	13.5404	0	0	un788
16	31132.8	15	9.63613	0	0	un795
17	29692.9	11	7.40919	0	0	un802
18	32036.8	10	6.24282	0	0	un809
19	31370.2	11	7.01303	0	0	un816
20	29725.8	20	13.4563	4	2.69127	un823
21	31334.4	20	12.7655	0	0	un830
22	27929.6	21	15.0378	0	0	un837
23	33444	21	12.5583	0	0	un844	jolie
24	33291	19	11.4145	0	0	un851
intestin	surface	rfp-pros+		rfp+pros+		photos			connectin eau 24032021
1	32679.6	20	12.24	0	0	un413
2	34020.8	25	14.6969	0	0	un420
3	31304.3	17	10.8611	0	0	un427	jolie
4	33533.6	18	10.7355	0	0	un434	jolie
5	34344.6	16	9.31734	0	0	un441	jolie
6	31800.1	16	10.0629	0	0	un448	jolie
7	31703.3	15	9.46274	0	0	un455	jolie
8	32002	22	13.7492	1	0.624962	un462	jolie
9	34294.1	28	16.3293	0	0	un469	jolie
intestin	surface	rfp-pros+		rfp+pros+					surexpressison de la connectin 06042021
1	34441	28	16.2597	0	0	un262	jolie
2	35202.2	10	5.68146	0	0	un295	jolie
3	29631.9	10	6.74949	6	4.04969	un309	jolie
4	32967.8	9	5.45987	0	0	un316	jolie
5	32385.4	20	12.3512	0	0	un323	jolie
6	32219.6	20	12.4148	0	0	un330	jolie

## Sheet: con 3j 4d22
intestin	surface	rfp-pros+		rfp+pros+		photsos
1	32777.9	20	12.2034	0	0	un56
2	32009.3	22	13.746	0	0	un63
3	32899.3	20	12.1583	0	0	un70
4	33645.5	16	9.51093	5	2.97217	un77
5	23978.7	22	18.3496	0	0	un84
6	29148.1	23	15.7815	2	1.3723	un91
7	32200.8	22	13.6643	1	0.621103	un98
8	25288.8	15	11.863	0	0	un105
9	31150.2	16	10.2728	0	0	un112
10	32992.8	17	10.3053	0	0	un119
11	33329.8	20	12.0013	0	0	un126
12	29283.7	23	15.7084	0	0	un142
13	31127.1	27	17.3482	0	0	un149
14	30043.8	10	6.65694	0	0	un156
15	30944.3	17	10.9875	0	0	un163
16	29324.8	21	14.3223	0	0	un170
17	25852	16	12.3781	0	0	un177
18	26012.3	17	13.0707	0	0	un184
19	29167.7	24	16.4566	0	0	un191
20	28434.5	15	10.5506	0	0	un198
			12.8668

## Sheet: con 3j delfin 
intestin	surface	rfp-pros+		rfp+pros+		photos		connectin 3j delfin 16032021
1	34304.3	4	2.33207	29	16.9075	un279
2	34315.8	14	8.1595	23	13.4049	un286
3	32527	8	4.91899	33	20.2908	un296
4	33749.6	11	6.51859	16	9.48158	un303
5	33332.3	13	7.80023	0	0	un319
6	33464.8	13	7.76935	0	0	un333
7	34296	21	12.2463	0	0	un343
8	33122.3	10	6.03823	21	12.6803	un350
9	33729.3	20	11.8591	4	2.37182	un364
10	33836.6	8	4.72861	11	6.50184	un371
11	33433.9	6	3.58917	24	14.3567	un378
12	33063.9	10	6.04889	0	0	un385
13	34523.8	22	12.7448	12	6.95173	un392
14	36230.1	20	11.0405	11	6.0723	un399
15	34725.9	17	9.79095	7	4.03157	un406
16	35027.7	11	6.28074	18	10.2776	un426
17	33112	9	5.43609	7	4.22807	un440
18	33567.9	8	4.76645	5	2.97903	un454
19	33874.5	14	8.2658	0	0	un468
20	32984.5	10	6.06345	28	16.9777	un482
21	37053.9	9	4.85779	7	3.77828	un625
22	36150.9	11	6.0856	13	7.19207	un616
23	33597.3	12	7.14343	17	10.1199	un607
24	35221.4	7	3.97486	9	5.11053	un598
25	34935.5	11	6.29733	12	6.86981	un589
26	33428.2	20	11.966	29	17.3506	un573
27	32424.5	12	7.40181	12	7.40181	un566
28	30624.8	25	16.3266	32	20.8981	un545
29	32188.2	12	7.45616	22	13.6696	un538
30	26170.9	13	9.93469	14	10.6989	un524
31	34865.6	25	14.3408	0	0	un517
32	30584.9	30	19.6175	13	8.50093	un510
33
intestin	surface	rfp-pros+		rfp+pros+		photos		connectin delfin 24032021
1	28828.5	21	14.5689	16	11.1001	un235
2	30525.3	14	9.17273	16	10.4831	un247
3	33927.8	24	14.1477	24	14.1477	un261
4	34942.4	7	4.00659	19	10.875	un275
intestin	surface	rfp-pros+		rfp+pros+		photos		27042021
1	35633.6	30	16.838	4	2.24507	un244
2	32726.3	20	12.2226	4	2.44452	un251
3	31640.7	32	20.2271	29	18.3308	un258
4	30554.5	16	10.4731	12	7.85481	un267
5	34072.7	25	14.6745	1	0.586981	un274
6	34669.3	10	5.76878	24	13.8451	un281
7	33449.3	24	14.3501	0	0	un288
8	33279	14	8.41371	30	18.0294	un323
9	32831.4	14	8.52841	19	11.5743	un330
10	32272.8	30	18.5915	2	1.23943	un344
intestin	surface	rfp-pros+		rfp+pros+		photos		6042021
1	34098.4	11	6.45191	20	11.7307	un58
2	35632.4	21	11.787	20	11.2257	un69
3	33952.9	21	12.3701	4	2.35621	un91
4	32307.6	9	5.57145	10	6.1905	un113
5	33757.5	13	7.702	7	4.14723	un123
6	32562.6	17	10.4414	2	1.2284	un134
7	33246.6	25	15.0391	18	10.8282	un154
8	31049.2	10	6.44138	17	10.9503	un176
9	33470.5	6	3.58524	18	10.7557	un206

## Sheet: con 3j cristaux
intestin	surface	rfp-pros+		rfp+pros+
1	34553.1	16	9.2611	12	6.94582	un66
2	33800.6	4	2.36682	12	7.10047	un76
3	33438.9	11	6.57916	8	4.78484	un83
4	35403.9	14	7.90873	17	9.60346	un108
5	33979.9	7	4.12008	28	16.4803	un119
6	33810.8	16	9.46444	30	17.7458	un126
7	35497	19	10.7051	16	9.01485	un148
8	34764.2	10	5.75305	22	12.6567	un159
9	32702.3	14	8.56208	12	7.33893	un170
10	32470.5	14	8.62321	15	9.23915	un184
11	30727.9	13	8.46135	15	9.7631	un191
12	29792.3	38	25.51	3	2.01395	un198
13	31863	25	15.6922	12	7.53224	un205
14	32092.7	11	6.85513	35	21.8118	un212
15

## Sheet: Sheet1
		eau				4d22					delfin					crisatux
rfp-pros+		rfp+pros+				12.2034	12.2034	0			2.33207	2.33207	16.9075			9.2611		6.94582
4.02854	4.02854	0				13.746	13.746	0			8.1595	8.1595	13.4049			2.36682		7.10047
5.41982	5.41982	0				12.1583	12.1583	0			4.91899	4.91899	20.2908			6.57916		4.78484
6.42687	6.42687	0				9.51093	9.51093	2.97217			6.51859	6.51859	9.48158			7.90873		9.60346
9.03907	9.03907	0				18.3496		0			7.80023	7.80023	0			4.12008		16.4803
10.1532	10.1532	0				15.7815		1.3723			7.76935	7.76935	0			9.46444		17.7458
12.8572		0.642859				13.6643		0.621103			12.2463		0			10.7051		9.01485
9.61877	9.61877	0				11.863	11.863	0			6.03823	6.03823	12.6803			5.75305		12.6567
11.4332	11.4332	0				10.2728	10.2728	0			11.8591		2.37182			8.56208		7.33893
6.67537	6.67537	0				10.3053	10.3053	0			4.72861	4.72861	6.50184			8.62321		9.23915
13.0747		0				12.0013	12.0013	0			3.58917	3.58917	14.3567			8.46135		9.7631
18.1086		0				15.7084		0			6.04889	6.04889	0			25.51		2.01395
16.2952		0				17.3482		0			12.7448		6.95173			15.6922		7.53224
4.10283	4.10283	0				6.65694	6.65694	0			11.0405		6.0723			6.85513		21.8118
6.41099	6.41099	0				10.9875	10.9875	0			9.79095	9.79095	4.03157			9.27589		10.1451
5.71916	5.71916	0				14.3223		0			6.28074	6.28074	10.2776
11.8357	11.8357	0				12.3781	12.3781	0			5.43609	5.43609	4.22807
7.99575	7.99575	0				13.0707		0			4.76645	4.76645	2.97903
6.32036	6.32036	0				16.4566		0			8.2658	8.2658	0
10.6446	10.6446	1.25231				10.5506	10.5506	0			6.06345	6.06345	16.9777
11.9693	11.9693	0				12.8668	11.0528	0.248278			4.85779	4.85779	3.77828
5.69088	5.69088	0									6.0856	6.0856	7.19207
5.30001	5.30001	0									7.14343	7.14343	10.1199
15.6007		0									3.97486	3.97486	5.11053
14.0688		0									6.29733	6.29733	6.86981
13.5404		0									11.966		17.3506
9.63613	9.63613	0									7.40181	7.40181	7.40181
7.40919	7.40919	0									16.3266		20.8981
6.24282	6.24282	0									7.45616	7.45616	13.6696
7.01303	7.01303	0									9.93469	9.93469	10.6989
13.4563		2.69127									14.3408		0
12.7655		0									19.6175		8.50093
15.0378		0									16.838		2.24507
12.5583		0									12.2226		2.44452
11.4145	11.4145	0									20.2271		18.3308
12.24		0									10.4731		7.85481
14.6969		0									14.6745		0.586981
10.8611	10.8611	0									5.76878		13.8451
10.7355	10.7355	0									14.3501		0
9.31734	9.31734	0									8.41371	8.41371	18.0294
10.0629	10.0629	0									8.52841	8.52841	11.5743
9.46274	9.46274	0									18.5915		1.23943
13.7492		0.624962									6.45191	6.45191	11.7307
16.3293		0									11.787		11.2257
16.2597		0									12.3701		2.35621
5.68146	5.68146	0									5.57145	5.57145	6.1905
6.74949	6.74949	4.04969									7.702	7.702	4.14723
5.45987	5.45987	0									10.4414		1.2284
12.3512		0									15.0391		10.8282
12.4148		0									6.44138	6.44138	10.9503
10.2905	8.02679	0.189002									3.58524	3.58524	10.7557
											9.24074	6.39848	7.93465
	H2O	4d22	delfin
rfp-pros+	10.29	11.05	10.25
rfp+pros+	0.13	0.24	6.82

## Sheet: Graph et stat Armel
20000µm²	EAU			4D22			Delfin			Cristaux
	Old EEC	New EEC		Old EEC	New EEC		Old EEC	New EEC		Old EEC	New EEC
	Pros+ RFP-	Pros+- RFP+		Pros+ RFP-	Pros+- RFP+		Pros+ RFP-	Pros+- RFP+		Pros+ RFP-	Pros+- RFP+
	4.02854	0		12.2034	0		2.33207	16.9075		9.2611	6.94582
	5.41982	0		13.746	0		8.1595	13.4049		2.36682	7.10047
	6.42687	0		12.1583	0		4.91899	20.2908		6.57916	4.78484
	9.03907	0		9.51093	2.97217		6.51859	9.48158		7.90873	9.60346
	10.1532	0		18.3496	0		7.80023	0		4.12008	16.4803
	12.8572	0.642859		15.7815	1.3723		7.76935	0		9.46444	17.7458
	9.61877	0		13.6643	0.621103		12.2463	0		10.7051	9.01485
	11.4332	0		11.863	0		6.03823	12.6803		5.75305	12.6567
	6.67537	0		10.2728	0		11.8591	2.37182		8.56208	7.33893
	13.0747	0		10.3053	0		4.72861	6.50184		8.62321	9.23915
	18.1086	0		12.0013	0		3.58917	14.3567		8.46135	9.7631
	16.2952	0		15.7084	0		6.04889	0		25.51	2.01395
	4.10283	0		17.3482	0		12.7448	6.95173		15.6922	7.53224
	6.41099	0		6.65694	0		11.0405	6.0723		6.85513	21.8118
	5.71916	0		10.9875	0		9.79095	4.03157
	11.8357	0		14.3223	0		6.28074	10.2776
	7.99575	0		12.3781	0		5.43609	4.22807
	6.32036	0		13.0707	0		4.76645	2.97903
	10.6446	1.25231		16.4566	0		8.2658	0
	11.9693	0		10.5506	0		6.06345	16.9777
	5.69088	0					4.85779	3.77828
	5.30001	0					6.0856	7.19207
	15.6007	0					7.14343	10.1199
	14.0688	0					3.97486	5.11053
	13.5404	0					6.29733	6.86981
	9.63613	0					11.966	17.3506
	7.40919	0					7.40181	7.40181
	6.24282	0					16.3266	20.8981
	7.01303	0					7.45616	13.6696
	13.4563	2.69127					9.93469	10.6989
	12.7655	0					14.3408	0
	15.0378	0					19.6175	8.50093
	12.5583	0					14.5689	11.1001
	11.4145	0					9.17273	10.4831
	12.24	0					14.1477	14.1477
	14.6969	0					4.00659	10.875
	10.8611	0					16.838	2.24507
	10.7355	0					12.2226	2.44452
	9.31734	0					20.2271	18.3308
	10.0629	0					10.4731	7.85481
	9.46274	0					14.6745	0.586981
	13.7492	0.624962					5.76878	13.8451
	16.3293	0					14.3501	0
	16.2597	0					8.41371	18.0294
	5.68146	0					8.52841	11.5743
	6.74949	4.04969					18.5915	1.23943
	5.45987	0					6.45191	11.7307
	12.3512	0					11.787	11.2257
	12.4148	0					12.3701	2.35621
							5.57145	6.1905
							7.702	4.14723
							10.4414	1.2284
							15.0391	10.8282
							6.44138	10.9503
							3.58524	10.7557
MOYENNE	10.2905	0.189002		12.8668	0.248278		9.33044	8.20497		9.27589	10.1451
Ecart type	3.71314	0.710995		2.88479	0.720742		4.40045	5.93351		5.61674	5.34875
n	49	49		20	20		55	55		14	14
SEM	0.530448	0.101571		0.645059	0.161163		0.593356	0.800074		1.50114	1.42951
	H2O	4D22	Delfin	Cristaux
Pros+ RFP-	10.2905	12.8668	10.2744	9.27589
Pros+ RFP+	0.189002	0.248278	10.4705	10.1451
