# Supplementary material for: Bacillus thuringiensis toxins divert progenitor cells toward enteroendocrine fate by decreasing cell adhesion with intestinal stem cells in Drosophila
Source: eLife journal article supplement (doi:10.7554/elife.80179), 2023-02-06
Supplement: fig5-figsupp2-data1 [file fig5 fig sup 2J.xlsx]

## Sheet: 3j eau 
intestin	surface	GFP+				GFP-DAPI+RFP+	RFP-			GFP-DAPI+RFP-	RFP+
1	36838.1	59	32.032	32.032		109	59.1778	59.1778		0	0	0	un80
2	34622.7	80	46.2124	46.2124		95	54.8773	54.8773		0	0	0	un87
3	36172.8	60	33.1741	33.1741		133	73.5359	73.5359		0	0	0	un94
4	33512.3	107	63.8572	63.8572		126	75.1963	75.1963		0	0	0	un101
5	34677.9	80	46.1389	46.1389		131	75.5525	75.5525		10	5.76737	5.76737	un112
6	35487.9	68	38.3229	38.3229		125	70.4465	70.4465		5	2.81786	2.81786	un119
7	33133.3	72	43.4607	43.4607		132	79.678	79.678		0	0	0	un126
8	30886.2	63	40.7949	40.7949		97	62.8112	62.8112		3	1.94262	1.94262	un133
9	36984.9	80	43.2609	43.2609		95	51.3723	51.3723		9	4.86685	4.86685	un140
				58.7167				81.204				0.624646
				39.007				84.9346				0
				35.3859				32.4371				1.17953
				37.3052				40.1749				0
1	32018.1	94	58.7167	27.1225		130	81.204	33.0894		1	0.624646	0	un670
2	31789.2	62	39.007	29.3292		135	84.9346	55.2742		0	0	0	un677
3	33911.8	60	35.3859	33.5349		55	32.4371	61.4806		2	1.17953	0	un684
4	34847.7	65	37.3052	34.209		70	40.1749	55.8746		0	0	0	un691
4	36869.8	50	27.1225	41.0165		61	33.0894	43.264		0	0	2.80935	un698
5	35459.6	52	29.3292	38.2699		98	55.2742	78.3062		0	0	0	un705
6	35783.6	60	33.5349	34.5073		110	61.4806	48.4313		0	0	0	un712
7	35078.5	60	34.209	34.2662		98	55.8746	64.1812		0	0	0	un719
8	35595.4	73	41.0165	46.6482		77	43.264	83.3003		5	2.80935	2.66561	un726
9	33969.2	65	38.2699	59.481		133	78.3062	72.7768		0	0	2.09933	un739
10	33036.5	57	34.5073	40.1952		80	48.4313	77.5193		0	0	1.72265	un746
11	36770.9	63	34.2662	50.2647		118	64.1812	57.5319		0	0	0	un760
12	30011.9	70	46.6482	34.4657		125	83.3003	66.0593		4	2.66561	0	un774
13	28580.6	85	59.481	35.6311		104	72.7768	67.5762		3	2.09933	0	un781
14	34830.1	70	40.1952	27.8925		135	77.5193	74.3801		3	1.72265	0	un788
15	33025.2	83	50.2647	51.4236		95	57.5319	80.3493		0	0	0	un795
16	34817.2	60	34.4657	59.398		115	66.0593	85.7971		0	0	3.29989	un802
17	32555.9	58	35.6311	42.9123		110	67.5762	57.8975		0	0	0.681147	un809
18	32266.7	45	27.8925	41.305		120	74.3801	68.8417		0	0	0.550734	un816
19	31114.1	80	51.4236	44.1834		125	80.3493	59.4776		0	0	0	un823
20	30304.1	90	59.398	31.1274		130	85.7971	67.9143		5	3.29989	1.13191	un830
21	29362.2	63	42.9123	41.7903		85	57.8975	77.1513		1	0.681147	0	un837
22	36315.2	75	41.305	44.063		125	68.8417	73.4383		1	0.550734	0	un844
23	35307.4	78	44.1834	30.5444		105	59.4776	65.365		0	0	0	un851
				25.5675				36.9308				5.68167
				29.8357				65.6386				0
				38.283				54.2342				0
1	35338.7	55	31.1274	41.9863		120	67.9143	53.1826		2	1.13191	0	un413
2	31107.7	65	41.7903	29.978		120	77.1513	66.2974		0	0	0	un420
3	34042.2	75	44.063	33.4066		125	73.4383	48.9964		0	0	0	un427
4	32739.2	50	30.5444	40.0779		107	65.365	50.8451		0	0	1.19636	un434
5	35200.9	45	25.5675	35.4134		65	36.9308	67.8758		10	5.68167	0	un441
6	33516.8	50	29.8357	43.3365		110	65.6386	69.3384		0	0	0	un448
7	31345.5	60	38.283	27.1846		85	54.2342	51.3488		0	0	0	un455
8	35725.9	75	41.9863	34.0834		95	53.1826	48.2849		0	0	0	un462
9	34692.1	52	29.978	39.3834		115	66.2974	63.1177		0	0	0.813281	un469
1	35921	60	33.4066			88	48.9964			0	0		un262
2	33434.9	67	40.0779			85	50.8451			2	1.19636		un271
3	33885.4	60	35.4134			115	67.8758			0	0		un281
4	34612.9	75	43.3365			120	69.3384			0	0		un295
5	33106.9	45	27.1846			85	51.3488			0	0		un309
6	35207.7	60	34.0834			85	48.2849			0	0		un316

## Sheet: 3j 4d22
intestin	surface	GFP+				GFP-DAPI+RFP-			GFP-DAPI+RFP+
1	35996.1	75	41.6712			135	75.0082		10	5.55616		un56
2	34754.6	102	58.6973			95	54.669		13	7.48102		un63
3	32589.7	96	58.9144			105	64.4376		0	0		un70
4	33639.4	70	41.6179			130	77.2903		12	7.13449		un77
5	27203.3	90	66.1686			115	84.5487		0	0		un84
6	31623.4	96	60.7146			105	66.4066		3	1.89733		un91
7	34394.1	65	37.7972			125	72.6869		0	0		un98
8	28055.3	50	35.6438			75	53.4657		0	0		un105
9	31940.1	85	53.2247			135	84.5333		1	0.626172		un112
10	35090.8	92	52.4354			110	62.6945		10	5.6995		un119
11	34793.8	105	60.3555			115	66.1037		1	0.574814		un126
12	32266.3	75	46.4881			125	77.4802		8	4.95873		un142
13	32981.4	70	42.4481			115	69.7362		2	1.2128		un149
14	34540	96	55.5878			95	55.0088		0	0		un156
15	33522.3	85	50.7125			85	50.7125		0	0		un163
16	34077.8	68	39.9087			120	70.4272		2	1.17379		un170
17	28491.7	60	42.1176			133	93.3607		3	2.10588		un177
18	32669.5	95	58.1583			145	88.7679		2	1.22439		un184
19	35328	72	40.7608			130	73.5959		1	0.566123		un191
20	25367.1	70	55.1897			135	106.437		4	3.15369		un198
			49.9306				72.3686			2.16824

## Sheet: 3j cristaux 
intestin	surface	GFP+				GFP-DAPI+RFP-			GFP-DAPI+RFP+		images
un246	35923	80	44.5397			102	56.7881		5	2.78373
2	37684.6	90	47.7648			65	34.4968		26	13.7987
3	32737.1	85	51.9289			95	58.0382		12	7.33114
4	34291.4	102	59.4902			85	49.5751		26	15.1642
un230	35150	110	62.5889			99	56.33		0	0
6	34099.7	120	70.3819			35	20.5281		30	17.5955
un221	35550	95	53.4459			86	48.3826		15	8.43882
un195	36121	120	66.4433			103	57.0305		3	1.66108
un180	29524	125	84.6769			81	54.8706		9	6.09673
10	31985.5	110	68.7811			80	50.0227		25	15.6321
11	32258.7	120	74.3986			80	49.5991		35	21.6996
12	32647.7	65	39.819			100	61.2601		10	6.12601
13	27833.1	65	46.707			65	46.707		15	10.7785
14	27279.3	72	52.7873			55	40.3236		12	8.79789
			58.8395				48.8538			9.70743

## Sheet: SA11
intestin	surface	GFP+				GFP-DAPI+RFP-			GFP-DAPI+RFP+
1	36577.6	110	60.146	60.146		30	16.4035	16.4035	50	27.3391		27.3391
2	35358.6	140	79.1887	79.1887		89	50.3414	50.3414	22	12.4439		12.4439
3	35904.1	144	80.2136	80.2136		76	42.335	42.335	10	5.57039		5.57039
4	36056.1	122	67.6723	67.6723		115	63.7894	63.7894	16	8.87505		8.87505
5	33783.3	80	47.3606	47.3606		125	74.001	74.001	4	2.36803	un319	2.36803
6	35007.1	124	70.8428	70.8428		15	8.56969	8.56969	26	14.8541	un326	14.8541
7	35960.2	155	86.2064	86.2064		120	66.7404	66.7404	0	0	un333	0
8	33101.9	105	63.4405	63.4405		145	87.6084	87.6084	1	0.604196	un343	0.604196
9	36218.5	160	88.3527	88.3527		9	4.96984	4.96984	45	24.8492	un350	24.8492
10	36233.1	135	74.5176	74.5176		115	63.4779	63.4779	9	4.96784	un364	4.96784
11	34719.1	105	60.4855	60.4855		28	16.1295	16.1295	37	21.3139	un371	21.3139
12	32891	120	72.9682	72.9682		85	51.6858	51.6858	1	0.608068	un385	0.608068
13	35796.6	110	61.4583	61.4583		125	69.839	69.839	4	2.23485	un392	2.23485
14	32182.4	105	65.253	65.253		95	59.0384	59.0384	25	15.5364	un399	15.5364
15	35388.2	130	73.4709	73.4709		75	42.3871	42.3871	20	11.3032	un406	11.3032
16	34656	100	57.71	57.71		60	34.626	34.626	23	13.2733	un426	13.2733
17	33505.5	85	50.7379	50.7379		45	26.8613	26.8613	12	7.163	un440	7.163
18	36008.7	110	61.0964	61.0964		63	34.9916	34.9916	10	5.55422	un454	5.55422
19	30517.9	115	75.3656	75.3656		120	78.6424	78.6424	12	7.86424	un468	7.86424
20	29692.8	105	70.7243	70.7243		70	47.1495	47.1495	10	6.73565	un482	6.73565
21	29571.9	110	74.395	74.395		105	71.0134	71.0134	10	6.76318	un496	6.76318
22	32569.1	106	65.0923	65.0923		125	76.7598	76.7598	15	9.21118	un503	9.21118
23	36082.7	120	66.514	66.514		65	36.0284	36.0284	30	16.6285	un510	16.6285
24	35597.2	110	61.8026	61.8026		85	47.7565	47.7565	5	2.80921	un517	2.80921
25	26852	102	75.9721	75.9721		104	77.4617	77.4617	7	5.21377	un524	5.21377
26	30683.8	86	56.0556	56.0556		85	55.4038	55.4038	0	0	un531	0
27	35117	85	48.4096	48.4096		55	31.3239	31.3239	15	8.54287	un625	8.54287
28	35128.9	115	65.4732	65.4732		50	28.4666	28.4666	10	5.69332	un616	5.69332
29	35003.1	88	50.2813	50.2813		45	25.712	25.712	35	19.9982	un607	19.9982
30	36143.5	115	63.6353	63.6353		40	22.134	22.134	23	12.7271	un598	12.7271
31	34316.6	102	59.4464	59.4464		45	26.2264	26.2264	25	14.5702	un589	14.5702
32	34623.3	140	80.8704	80.8704		40	23.1058	23.1058	20	11.5529	un573	11.5529
				76.681				27.884				17.4275
				58.5933				25.599				9.10187
				61.0391				59.8653				14.6729
1	28690.3	110	76.681	72.7315		40	27.884	63.034	25	17.4275	un235	4.84877
2	35157.6	103	58.5933	58.9782		45	25.599	65.1864	16	9.10187	un254	6.20823
3	34076.5	104	61.0391	64.7337		102	59.8653	40.8844	25	14.6729	un261	1.36281
4	32998.1	120	72.7315	77.3177		104	63.034	40.2052	8	4.84877	un268	9.27812
				75.7643				37.8822				12.6274
				59.6225				25.5525				8.5175
1	32215.3	95	58.9782	48.9356		105	65.1864	48.9356	10	6.20823	un244	2.87857
2	29351	95	64.7337	80.2333		60	40.8844	50.1458	2	1.36281	un251	8.02333
3	32334.1	125	77.3177	72.1222		65	40.2052	37.5035	15	9.27812	un258	5.76977
4	31677.2	120	75.7643	75.2245		60	37.8822	37.6123	20	12.6274	un267	6.9438
5	35221.6	105	59.6225	57.8908		45	25.5525	34.0534	15	8.5175	un274	8.85389
6	34739.5	85	48.9356	66.8484		85	48.9356	44.6809	5	2.87857	un288	9.21051
7	29912.8	120	80.2333			75	50.1458		12	8.02333	un302
8	34663.4	125	72.1222			65	37.5035		10	5.76977	un323
9	34563.2	130	75.2245			65	37.6123		12	6.9438	un330
10	29365.6	85	57.8908			50	34.0534		13	8.85389	un344

## Sheet: STAT GFP+
H2O	4D22
32.032	41.6712		Tukey-Kramer Test: Pairwise Comparisons for One-Way Layout Design
46.2124	58.6973
33.1741	58.9144			H2O	4D22
63.8572	41.6179		Mean	39.3834	49.9306
46.1389	66.1686		S.E.M.	1.28184	2.04769
38.3229	60.7146		S.D.	8.88082	9.15755
43.4607	37.7972		Variance	78.869	83.8607
40.7949	35.6438		Sum	1890.4	998.612
43.2609	53.2247		N	48	20
58.7167	52.4354
39.007	60.3555		Grand Mean	42.4855
35.3859	46.4881		Total N	68
37.3052	42.4481
27.1225	55.5878		Errors Estimates
29.3292	50.7125		SS(E)	5300.2
33.5349	39.9087		Df(E)	66
34.209	42.1176		Var(E)	80.306
41.0165	58.1583		SE(E)	8.96136
38.2699	40.7608
34.5073	55.1897		t-Table	Upper Right: tij (Test Statistics between i and j groups); Lower Left: P-Values (Studentized Range Distribution)
34.2662
46.6482				H2O		4D22
59.481			H2O			4.42226	*** (P<=0.001)
40.1952			4D22	3.87e-05
50.2647
34.4657
35.6311
27.8925
51.4236
59.398
42.9123
41.305
44.1834
31.1274
41.7903
44.063
30.5444
25.5675
29.8357
38.283
41.9863
29.978
33.4066
40.0779
35.4134
43.3365
27.1846
34.0834
H2O	SA11
32.032	60.146
46.2124	79.1887		Tukey-Kramer Test: Pairwise Comparisons for One-Way Layout Design
33.1741	80.2136
63.8572	67.6723			H2O	SA11
46.1389	47.3606		Mean	39.3834	66.8484
38.3229	70.8428		S.E.M.	1.28184	1.50354
43.4607	86.2064		S.D.	8.88082	10.1975
40.7949	63.4405		Variance	78.869	103.989
43.2609	88.3527		Sum	1890.4	3075.03
58.7167	74.5176		N	48	46
39.007	60.4855
35.3859	72.9682		Grand Mean	52.8237
37.3052	61.4583		Total N	94
27.1225	65.253
29.3292	73.4709		Errors Estimates
33.5349	57.71		SS(E)	8386.34
34.209	50.7379		Df(E)	92
41.0165	61.0964		Var(E)	91.1558
38.2699	75.3656		SE(E)	9.54756
34.5073	70.7243
34.2662	74.395		t-Table	Upper Right: tij (Test Statistics between i and j groups); Lower Left: P-Values (Studentized Range Distribution)
46.6482	65.0923
59.481	66.514			H2O		SA11
40.1952	61.8026		H2O			13.9419	*** (P<=0.001)
50.2647	75.9721		SA11	1.402e-06
34.4657	56.0556
35.6311	48.4096
27.8925	65.4732
51.4236	50.2813
59.398	63.6353
42.9123	59.4464
41.305	80.8704
44.1834	76.681
31.1274	58.5933
41.7903	61.0391
44.063	72.7315
30.5444	58.9782
25.5675	64.7337
29.8357	77.3177
38.283	75.7643
41.9863	59.6225
29.978	48.9356
33.4066	80.2333
40.0779	72.1222
35.4134	75.2245
43.3365	57.8908
27.1846
34.0834
H2O	Cristaux
32.032	44.5397		Tukey-Kramer Test: Pairwise Comparisons for One-Way Layout Design
46.2124	47.7648
33.1741	51.9289			H2O	cristaux
63.8572	59.4902		Mean	39.3834	58.8395
46.1389	62.5889		S.E.M.	1.28184	3.07609
38.3229	70.3819		S.D.	8.88082	11.5097
43.4607	53.4459		Variance	78.869	132.472
40.7949	66.4433		Sum	1890.4	815.684
43.2609	84.6769		N	48	14
58.7167	68.7811
39.007	74.3986		Grand Mean	43.6466
35.3859	39.819		Total N	62
37.3052	46.707
27.1225	52.7873		Errors Estimates
29.3292			SS(E)	5428.99
33.5349			Df(E)	60
34.209			Var(E)	90.4831
41.0165			SE(E)	9.51226
38.2699
34.5073			t-Table	Upper Right: tij (Test Statistics between i and j groups); Lower Left: P-Values (Studentized Range Distribution)
34.2662
46.6482				H2O		cristaux
59.481			H2O			6.53432	*** (P<=0.001)
40.1952			cristaux	1.392e-06
50.2647
34.4657
35.6311
27.8925
51.4236
59.398
42.9123
41.305
44.1834
31.1274
41.7903
44.063
30.5444
25.5675
29.8357
38.283
41.9863
29.978
33.4066
40.0779
35.4134
43.3365
27.1846
34.0834

## Sheet: stat old EC GFP-DAPI+RFP-
H2O	4D22
59.1778	75.0082
54.8773	54.669		Tukey-Kramer Test: Pairwise Comparisons for One-Way Layout Design
73.5359	64.4376
75.1963	77.2903			H2O	4D22
75.5525	84.5487		Mean	63.1177	72.3686
70.4465	66.4066		S.E.M.	1.98059	3.20709
79.678	72.6869		S.D.	13.7219	14.3425
62.8112	53.4657		Variance	188.291	205.708
51.3723	84.5333		Sum	3029.65	1447.37
81.204	62.6945		N	48	20
84.9346	66.1037
32.4371	77.4802		Grand Mean	65.8385
40.1749	69.7362		Total N	68
33.0894	55.0088
55.2742	50.7125		Errors Estimates
61.4806	70.4272		SS(E)	12758.2
55.8746	93.3607		Df(E)	66
43.264	88.7679		Var(E)	193.305
78.3062	73.5959		SE(E)	13.9034
48.4313	106.437
64.1812			t-Table	Upper Right: tij (Test Statistics between i and j groups); Lower Left: P-Values (Studentized Range Distribution)
83.3003
72.7768				H2O		4D22
77.5193			H2O			2.50001	* (P<=0.05)
57.5319			4D22	0.01491
66.0593
67.5762
74.3801
80.3493
85.7971
57.8975
68.8417
59.4776
67.9143
77.1513
73.4383
65.365
36.9308
65.6386
54.2342
53.1826
66.2974
48.9964
50.8451
67.8758
69.3384
51.3488
48.2849
H2O	SA11		Tukey-Kramer Test: Pairwise Comparisons for One-Way Layout Design
59.1778	16.4035
54.8773	50.3414			H2O	SA11
73.5359	42.335		Mean	63.1177	44.6809
75.1963	63.7894		S.E.M.	1.98059	2.98638
75.5525	74.001		S.D.	13.7219	20.2546
70.4465	8.56969		Variance	188.291	410.25
79.678	66.7404		Sum	3029.65	2055.32
62.8112	87.6084		N	48	46
51.3723	4.96984
81.204	63.4779		Grand Mean	54.0954
84.9346	16.1295		Total N	94
32.4371	51.6858
40.1749	69.839		Errors Estimates
33.0894	59.0384		SS(E)	27310.9
55.2742	42.3871		Df(E)	92
61.4806	34.626		Var(E)	296.858
55.8746	26.8613		SE(E)	17.2296
43.264	34.9916
78.3062	78.6424		t-Table	Upper Right: tij (Test Statistics between i and j groups); Lower Left: P-Values (Studentized Range Distribution)
48.4313	47.1495
64.1812	71.0134			H2O		SA11
83.3003	76.7598		H2O			-5.18616	*** (P<=0.001)
72.7768	36.0284		SA11	2.666e-06
77.5193	47.7565
57.5319	77.4617
66.0593	55.4038
67.5762	31.3239
74.3801	28.4666
80.3493	25.712
85.7971	22.134
57.8975	26.2264
68.8417	23.1058
59.4776	27.884
67.9143	25.599
77.1513	59.8653
73.4383	63.034
65.365	65.1864
36.9308	40.8844
65.6386	40.2052
54.2342	37.8822
53.1826	25.5525
66.2974	48.9356
48.9964	50.1458
50.8451	37.5035
67.8758	37.6123
69.3384	34.0534
51.3488
48.2849
H2O	Cristaux
59.1778	56.7881			Tukey-Kramer Test: Pairwise Comparisons for One-Way Layout Design
54.8773	34.4968
73.5359	58.0382				H2O	Cristaux
75.1963	49.5751			Mean	63.1177	48.8538
75.5525	56.33			S.E.M.	1.98059	4.05365
70.4465	20.5281			S.D.	13.7219	15.1674
79.678	48.3826			Variance	188.291	230.049
62.8112	57.0305			Sum	3029.65	537.698
51.3723	54.8706			N	48	14
81.204	50.0227
84.9346	49.5991			Grand Mean	57.5379
32.4371	61.2601			Total N	62
40.1749	46.707
33.0894	40.3236			Errors Estimates
55.2742				SS(E)	11840.3
61.4806				Df(E)	60
55.8746				Var(E)	197.339
43.264				SE(E)	14.0477
78.3062
48.4313				t-Table	Upper Right: tij (Test Statistics between i and j groups); Lower Left: P-Values (Studentized Range Distribution)
64.1812
83.3003					H2O		Cristaux
72.7768				H2O			-5.79118	*** (P<=0.001)
77.5193				Cristaux	1.646e-06
57.5319
66.0593
67.5762
74.3801
80.3493
85.7971
57.8975
68.8417
59.4776
67.9143
77.1513
73.4383
65.365
36.9308
65.6386
54.2342
53.1826
66.2974
48.9964
50.8451
67.8758
69.3384
51.3488
48.2849

## Sheet: stat new EC
H2O	4D22
0	5.55616		Tukey-Kramer Test: Pairwise Comparisons for One-Way Layout Design
0	7.48102
0	0			H2O	4D22
0	7.13449		Mean	0.813281	2.16824
5.76737	0		S.E.M.	0.218513	0.571601
2.81786	1.89733		S.D.	1.5139	2.55628
0	0		Variance	2.29189	6.53455
1.94262	0		Sum	39.0375	43.3649
4.86685	0.626172		N	48	20
0.624646	5.6995
0	0.574814		Grand Mean	1.2118
1.17953	4.95873		Total N	68
0	1.2128
0	0		Errors Estimates
0	0		SS(E)	231.875
0	1.17379		Df(E)	66
0	2.10588		Var(E)	3.51326
2.80935	1.22439		SE(E)	1.87437
0	0.566123
0	3.15369		t-Table	Upper Right: tij (Test Statistics between i and j groups); Lower Left: P-Values (Studentized Range Distribution)
0
2.66561				H2O		4D22
2.09933			H2O			2.71615	** (P<=0.01)
1.72265			4D22	0.008425
0
0
0
0
0
3.29989
0.681147
0.550734
0
1.13191
0
0
0
5.68167
0
0
0
0
0
1.19636
0
0
0
0
			Tukey-Kramer Test: Pairwise Comparisons for One-Way Layout Design
H2O	SA11			H2O	SA11
0	27.3391		Mean	0.813281	9.21051
0	12.4439		S.E.M.	0.218513	0.943959
0	5.57039		S.D.	1.5139	6.40224
0	8.87505		Variance	2.29189	40.9887
5.76737	2.36803		Sum	39.0375	423.684
2.81786	14.8541		N	48	46
0	0
1.94262	0.604196		Grand Mean	4.92256
4.86685	24.8492		Total N	94
0.624646	4.96784
0	21.3139		Errors Estimates
1.17953	0.608068		SS(E)	1952.21
0	2.23485		Df(E)	92
0	15.5364		Var(E)	21.2197
0	11.3032		SE(E)	4.60648
0	13.2733
0	7.163		t-Table	Upper Right: tij (Test Statistics between i and j groups); Lower Left: P-Values (Studentized Range Distribution)
2.80935	5.55422
0	7.86424			H2O		SA11
0	6.73565		H2O			8.83492	*** (P<=0.001)
0	6.76318		SA11	1.402e-06
2.66561	9.21118
2.09933	16.6285
1.72265	2.80921
0	5.21377
0	0
0	8.54287
0	5.69332
0	19.9982
3.29989	12.7271
0.681147	14.5702
0.550734	11.5529
0	17.4275
1.13191	9.10187
0	14.6729
0	4.84877
0	6.20823
5.68167	1.36281
0	9.27812
0	12.6274
0	8.5175
0	2.87857
0	8.02333
1.19636	5.76977
0	6.9438
0	8.85389
0
0
H2O	Cristaux		Tukey-Kramer Test: Pairwise Comparisons for One-Way Layout Design
0	2.78373
0	13.7987			H2O	Cristaux
0	7.33114		Mean	0.813281	9.70743
0	15.1642		S.E.M.	0.218513	2.27696
5.76737	0		S.D.	1.5139	8.5196
2.81786	17.5955		Variance	2.29189	72.5836
0	8.43882		Sum	39.0375	254.034
1.94262	1.66108		N	48	14
4.86685	6.09673
0.624646	15.6321		Grand Mean	4.72696
0	21.6996		Total N	62
1.17953	6.12601
0	10.7785		Errors Estimates
0	8.79789		SS(E)	1051.31
0			Df(E)	60
0			Var(E)	17.5218
0			SE(E)	4.1859
2.80935
0			t-Table	Upper Right: tij (Test Statistics between i and j groups); Lower Left: P-Values (Studentized Range Distribution)
0
0				H2O		Cristaux
2.66561			H2O			13.6316	*** (P<=0.001)
2.09933			Cristaux	1.377e-06
1.72265
0
0
0
0
0
3.29989
0.681147
0.550734
0
1.13191
0
0
0
5.68167
0
0
0
0
0
1.19636
0
0
0
0

## Sheet: graphe EC 
	Old	SEM Old	New	SEM New
H2O	63.1177	1.98059	0.813281	0.218513
4D22	72.3686	3.20709	2.16824	0.571601
SA11	44.6809	2.98638	9.21051	0.943959
Cristaux	48.8538	4.05365	9.70743	2.27696

## Sheet: graphe GFP+
H2O	39.3834
4D22	49.9306
SA11	66.8484
Cristaux	58.8395
